# Supplementary material for: Engineered RNA biosensors enable ultrasensitive SARS-CoV-2 detection in a simple color and luminescence assay
Source: Life Sci Alliance. 2021 Sep 30;4(12):e202101213. doi: 10.26508/lsa.202101213 (PMC8500229; doi:10.26508/lsa.202101213)
Supplement: Supplementary file 3 [file LSA-2021-01213_SdataF2.xlsx]

## Sheet: 2A
Sensor	OFF State		ON State
	Trial 1	Trial 2	Trial 1	Trial 2
16	7.672	7.581	5.849	5.958
15	6.216	6.985	7.198	7.087
6	7.463	0.949	9.154	7.01
9	2.766	0.989	7.256	6.963
2	1.681	1.336	4.466	3.098
3	2.299	2.244	7.457	6.517
18	1.507	2.541	5.204	6.037
11	1.351	0.218	5.072	1.876
21	1.069	0.876	4.322	6.786
20	1.547	1.446	7.136	6.937
14	1.434	1.825	6.76	7.3
22	0.563	0.563	7.282	6.302
10	0.511	0.425	7.297	6.389
4	0.576	0.382	8.401	6.451
19	0.484	0.446	7.305	6.825
1	0.455	0.328	7.211	6.017
12	0.378	0.377	6.561	5.474
8	0.242	0.33	5.649	3.786
17	0.278	0.466	7.389	6.752

## Sheet: 2B
Violin plot of the sensor parameters
Top four sensors
Sensor	Toehold single strandedness	Lower stem pairing probability	Similarity to expected structure	Trigger strandedness
B01	0.827	0.996	0.863	0.697
B10	0.784	0.986	0.822	0.706
B12	0.799	0.994	0.849	0.618
B17	0.775	0.989	0.828	0.718
Sensors that were chosen
Sensor	Toehold single strandedness	Lower stem pairing probability	Similarity to expected structure	Trigger strandedness
B22	0.841	0.993	0.867	0.621
B09	0.674	0.992	0.809	0.725
B21	0.81	0.99	0.843	0.605
B08	0.77	0.988	0.834	0.734
B04	0.697	0.998	0.824	0.665
B20	0.824	0.995	0.833	0.645
B19	0.807	0.997	0.841	0.656
B14	0.684	0.996	0.814	0.738
B11	0.759	0.993	0.808	0.706
B18	0.829	0.986	0.862	0.725
B15	0.751	0.991	0.84	0.699
B16	0.783	0.983	0.826	0.663
B02	0.886	0.986	0.875	0.599
B06	0.796	0.982	0.835	0.62
B03	0.84	0.993	0.862	0.459
Sensors that passed filter criteria
Sensor	Toehold single strandedness	Lower stem pairing probability	Similarity to expected structure	Trigger strandedness
F_9953_23_R_19767_24_25_sB_C	0.636784	0.998875	0.7682	0.678512
F_9953_23_R_19767_24_25_sB_T	0.637215	0.998784	0.7684	0.678512
F_21569_21_R_8143_20_51_sB_C	0.698522	0.990223	0.7972	0.636127
F_21569_21_R_8143_20_51_sB_G	0.621122	0.996154	0.7668	0.636127
F_21569_21_R_8143_20_51_sB_T	0.682999	0.986873	0.7852	0.636127
F_21569_21_R_8143_20_52_sB_A	0.67369	0.997278	0.7934	0.617009
F_21569_21_R_8143_20_52_sB_C	0.700183	0.996518	0.7982	0.617009
F_21569_21_R_8143_20_52_sB_G	0.708203	0.997578	0.7991	0.617009
F_21569_21_R_8143_20_52_sB_T	0.667559	0.997887	0.7809	0.617009
F_27708_20_R_2005_22_60_sB_A	0.831399	0.98159	0.861	0.645469
F_27708_20_R_2005_22_60_sB_G	0.79611	0.993697	0.8441	0.645469
F_22620_20_R_7069_20_1_sB_C	0.776138	0.974933	0.8291	0.681426
F_22620_20_R_7069_20_1_sB_T	0.738013	0.995765	0.8032	0.681426
F_25748_24_R_3938_22_7_sB_A	0.802366	0.971053	0.8454	0.620474
F_25748_24_R_3938_22_7_sB_G	0.76736	0.985251	0.8317	0.620474
F_25748_24_R_3938_22_7_sB_T	0.711114	0.994038	0.8031	0.620474
F_1213_22_R_28521_23_11_sB_A	0.749305	0.982268	0.8354	0.608151
F_1213_22_R_28521_23_11_sB_C	0.742361	0.970525	0.8291	0.608151
F_1213_22_R_28521_23_11_sB_G	0.72213	0.987506	0.8231	0.608151
F_1213_22_R_28521_23_11_sB_T	0.714777	0.993006	0.8185	0.608151
F_23627_24_R_6107_24_13_sB_C	0.621563	0.992875	0.7673	0.645081
F_21569_21_R_8143_20_32_sB_A	0.704058	0.996826	0.821	0.616284
F_21569_21_R_8143_20_32_sB_C	0.7145	0.988106	0.8231	0.616284
F_21569_21_R_8143_20_32_sB_G	0.686992	0.995677	0.82	0.616284
F_23359_22_R_6356_24_35_sB_A	0.660024	0.994369	0.7869	0.603812
F_23359_22_R_6356_24_35_sB_C	0.619587	0.997183	0.7646	0.603812
F_23359_22_R_6356_24_35_sB_G	0.657368	0.995558	0.7858	0.603812
F_23359_22_R_6356_24_35_sB_T	0.620448	0.996336	0.7649	0.603812
F_28062_22_R_1661_24_3_sB_A	0.750805	0.976172	0.8384	0.6038
F_28062_22_R_1661_24_3_sB_C	0.736492	0.996061	0.829	0.6038
F_28062_22_R_1661_24_3_sB_T	0.722441	0.978131	0.82	0.6038
F_28062_22_R_1661_24_2_sB_A	0.745504	0.984506	0.8395	0.601535
F_28062_22_R_1661_24_2_sB_C	0.745543	0.980572	0.8364	0.601535
F_28062_22_R_1661_24_2_sB_G	0.742276	0.985073	0.836	0.601535
F_28062_22_R_1661_24_2_sB_T	0.729603	0.994019	0.8293	0.601535
F_21569_21_R_8143_20_50_sB_A	0.658076	0.988114	0.7902	0.649798
F_21569_21_R_8143_20_50_sB_C	0.672321	0.98224	0.7942	0.649798
F_21569_21_R_8143_20_50_sB_T	0.659644	0.982292	0.7746	0.649798
F_25760_22_R_3938_22_0_sB_C	0.770429	0.988089	0.8344	0.733974
F_25760_22_R_3938_22_0_sB_T	0.766605	0.97486	0.8321	0.733974
F_21578_20_R_8106_22_92_sB_A	0.730713	0.993923	0.8309	0.640242
F_21578_20_R_8106_22_92_sB_C	0.703109	0.993194	0.8052	0.640242
F_21578_20_R_8106_22_92_sB_G	0.731918	0.99398	0.831	0.640242
F_21578_20_R_8106_22_92_sB_T	0.696516	0.994485	0.8104	0.640242
F_21569_21_R_8143_20_19_sB_T	0.617438	0.986277	0.7629	0.754519
F_21569_21_R_8143_20_18_sB_A	0.604322	0.989492	0.7533	0.740531
F_21569_21_R_8143_20_18_sB_C	0.606265	0.991335	0.7544	0.740531
F_21569_21_R_8143_20_18_sB_G	0.614224	0.992719	0.7593	0.740531
F_27708_20_R_2011_20_59_sB_A	0.828781	0.986377	0.8624	0.724784
F_27708_20_R_2011_20_59_sB_C	0.828734	0.973955	0.859	0.724784
F_27708_20_R_2011_20_59_sB_G	0.823564	0.981761	0.8588	0.724784
F_27708_20_R_2011_20_59_sB_T	0.799235	0.993861	0.8469	0.724784
F_11534_20_R_18176_20_44_sB_A	0.719448	0.990435	0.8225	0.646863
F_11534_20_R_18176_20_44_sB_G	0.696644	0.985521	0.8156	0.646863
F_22620_20_R_7069_20_0_sB_A	0.759329	0.985292	0.8304	0.660613
F_9518_22_R_20199_22_1_sB_A	0.744708	0.993491	0.8085	0.648478
F_9518_22_R_20199_22_1_sB_C	0.744619	0.993415	0.8084	0.648478
F_9518_22_R_20199_22_1_sB_G	0.744613	0.993548	0.8084	0.648478
F_9518_22_R_20199_22_1_sB_T	0.7088	0.99352	0.7884	0.648478
F_22012_24_R_7676_20_50_sB_A	0.610444	0.979585	0.793	0.606981
F_22012_24_R_7676_20_50_sB_C	0.604639	0.977618	0.7876	0.606981
F_22012_24_R_7676_20_50_sB_G	0.61409	0.978918	0.7957	0.606981
F_21569_21_R_8143_20_31_sB_C	0.655293	0.996867	0.7976	0.625929
F_21569_21_R_8143_20_31_sB_T	0.650286	0.99295	0.7956	0.625929
F_23359_22_R_6356_24_34_sB_A	0.671389	0.993609	0.795	0.607022
F_23359_22_R_6356_24_34_sB_C	0.626111	0.995685	0.7665	0.607022
F_23359_22_R_6356_24_34_sB_G	0.679223	0.995377	0.7987	0.607022
F_23359_22_R_6356_24_34_sB_T	0.65221	0.99548	0.7842	0.607022
F_23627_24_R_6107_24_25_sB_A	0.675774	0.992815	0.7976	0.612174
F_23627_24_R_6107_24_25_sB_C	0.61677	0.980964	0.7795	0.612174
F_23627_24_R_6107_24_25_sB_G	0.698308	0.9925	0.8019	0.612174
F_23627_24_R_6107_24_25_sB_T	0.645552	0.983028	0.789	0.612174
F_22620_20_R_7069_20_8_sB_A	0.751301	0.9909	0.8399	0.698707
F_22620_20_R_7069_20_8_sB_C	0.695048	0.990606	0.8082	0.698707
F_22620_20_R_7069_20_8_sB_G	0.71179	0.991214	0.818	0.698707
F_22620_20_R_7069_20_8_sB_T	0.744283	0.990086	0.8359	0.698707
F_9953_23_R_19767_24_23_sB_T	0.604638	0.997603	0.7579	0.693403
F_5788_20_R_23930_22_6_sB_A	0.633589	0.99669	0.7848	0.630434
F_5788_20_R_23930_22_6_sB_C	0.659849	0.980275	0.8003	0.630434
F_5788_20_R_23930_22_6_sB_G	0.630305	0.996259	0.782	0.630434
F_5788_20_R_23930_22_6_sB_T	0.668964	0.991403	0.8069	0.630434
F_27708_20_R_2005_20_64_sB_A	0.804622	0.974602	0.8444	0.609339
F_27708_20_R_2005_20_64_sB_C	0.802065	0.980075	0.8429	0.609339
F_27708_20_R_2005_20_64_sB_G	0.808145	0.978897	0.8485	0.609339
F_27708_20_R_2005_20_64_sB_T	0.771583	0.993337	0.8217	0.609339
F_21644_24_R_8086_22_40_sB_A	0.711628	0.995419	0.8314	0.625091
F_21644_24_R_8086_22_40_sB_C	0.707272	0.992737	0.8284	0.625091
F_21644_24_R_8086_22_40_sB_G	0.704791	0.995444	0.8283	0.625091
F_21644_24_R_8086_22_40_sB_T	0.673511	0.995587	0.8111	0.625091
F_21644_24_R_8086_22_39_sB_A	0.705451	0.981115	0.8219	0.647638
F_21644_24_R_8086_22_39_sB_C	0.684815	0.996597	0.8139	0.647638
F_21644_24_R_8086_22_39_sB_G	0.713951	0.978338	0.825	0.647638
F_21644_24_R_8086_22_39_sB_T	0.665541	0.977555	0.8006	0.647638
F_21644_24_R_8086_22_41_sB_A	0.699528	0.985393	0.8271	0.626239
F_21644_24_R_8086_22_41_sB_G	0.689795	0.986831	0.823	0.626239
F_21644_24_R_8086_22_41_sB_T	0.660134	0.992695	0.8083	0.626239
F_21569_21_R_8143_20_49_sB_A	0.654674	0.987283	0.8042	0.646038
F_21569_21_R_8143_20_49_sB_C	0.660995	0.972212	0.8017	0.646038
F_21569_21_R_8143_20_49_sB_G	0.658175	0.989631	0.7976	0.646038
F_25748_24_R_3938_22_9_sB_A	0.729707	0.981939	0.8212	0.668387
F_25748_24_R_3938_22_9_sB_G	0.729165	0.978435	0.8188	0.668387
F_21578_20_R_8106_22_91_sB_C	0.674291	0.992834	0.8057	0.616433
F_26798_24_R_2913_20_5_sB_A	0.660895	0.99813	0.8047	0.651597
F_26798_24_R_2913_20_5_sB_C	0.610826	0.995336	0.7725	0.651597
F_26798_24_R_2913_20_5_sB_G	0.659846	0.997142	0.8036	0.651597
F_26798_24_R_2913_20_5_sB_T	0.66732	0.997736	0.8081	0.651597
F_26798_24_R_2913_20_6_sB_A	0.6627	0.986263	0.8085	0.647288
F_26798_24_R_2913_20_6_sB_G	0.653883	0.985885	0.8019	0.647288
F_26798_24_R_2913_20_6_sB_T	0.636169	0.994665	0.7933	0.647288
F_21569_21_R_8143_20_17_sB_A	0.609827	0.991473	0.7556	0.726221
F_21569_21_R_8143_20_17_sB_G	0.608795	0.997309	0.7563	0.726221
F_27708_20_R_2012_20_58_sB_A	0.826226	0.996502	0.8628	0.69744
F_27708_20_R_2012_20_58_sB_C	0.826232	0.993593	0.8617	0.69744
F_27708_20_R_2012_20_58_sB_G	0.826716	0.996495	0.8629	0.69744
F_27708_20_R_2012_20_58_sB_T	0.795473	0.996613	0.8452	0.69744
F_2368_24_R_27354_24_47_sB_C	0.609248	0.993478	0.7825	0.602824
F_2368_24_R_27354_24_47_sB_T	0.613902	0.995333	0.7843	0.602824
F_2368_24_R_27354_24_46_sB_A	0.633094	0.997346	0.7908	0.624374
F_2368_24_R_27354_24_46_sB_C	0.623824	0.994791	0.7881	0.624374
F_2368_24_R_27354_24_46_sB_G	0.638319	0.997818	0.796	0.624374
F_27708_20_R_2012_20_50_sB_G	0.824364	0.994695	0.8327	0.645443
F_8930_22_R_20804_21_40_sB_G	0.770341	0.993876	0.8189	0.61053
F_8930_22_R_20804_21_41_sB_G	0.792993	0.993642	0.8328	0.604734
F_22427_23_R_7261_22_72_sB_A	0.69231	0.978408	0.8002	0.607109
F_22427_23_R_7261_22_72_sB_C	0.726842	0.992165	0.8221	0.607109
F_22427_23_R_7261_22_72_sB_G	0.69177	0.977406	0.7996	0.607109
F_22427_23_R_7261_22_72_sB_T	0.687145	0.974032	0.7951	0.607109
F_9518_22_R_20199_22_5_sB_C	0.785762	0.994388	0.842	0.634884
F_11534_20_R_18176_20_43_sB_A	0.71041	0.985421	0.8252	0.652615
F_11534_20_R_18176_20_43_sB_C	0.699526	0.983746	0.8213	0.652615
F_11534_20_R_18176_20_43_sB_G	0.69205	0.987684	0.8207	0.652615
F_11534_20_R_18176_20_43_sB_T	0.662067	0.992084	0.7961	0.652615
F_22615_22_R_7069_20_2_sB_C	0.696668	0.9732	0.8191	0.672314
F_22615_22_R_7069_20_2_sB_T	0.725742	0.993175	0.8165	0.672314
F_21569_21_R_8143_20_35_sB_A	0.662742	0.997327	0.7988	0.603735
F_21569_21_R_8143_20_35_sB_C	0.70863	0.982912	0.8214	0.603735
F_21569_21_R_8143_20_35_sB_G	0.657006	0.997035	0.7958	0.603735
F_21569_21_R_8143_20_35_sB_T	0.702006	0.98268	0.8184	0.603735
F_23359_22_R_6356_24_39_sB_A	0.730095	0.99522	0.8195	0.630387
F_23359_22_R_6356_24_39_sB_G	0.714317	0.996078	0.8085	0.630387
F_23359_22_R_6356_24_39_sB_T	0.661626	0.995912	0.7829	0.630387
F_23359_22_R_6356_24_38_sB_A	0.738093	0.99267	0.8171	0.612772
F_23359_22_R_6356_24_38_sB_C	0.712092	0.9966	0.8067	0.612772
F_23359_22_R_6356_24_38_sB_G	0.733694	0.981405	0.8141	0.612772
F_23359_22_R_6356_24_38_sB_T	0.69742	0.989946	0.793	0.612772
F_9518_22_R_20199_22_0_sB_A	0.741487	0.99225	0.8082	0.632361
F_9518_22_R_20199_22_0_sB_C	0.706509	0.992955	0.7887	0.632361
F_9518_22_R_20199_22_0_sB_G	0.737055	0.972812	0.8027	0.632361
F_9518_22_R_20199_22_0_sB_T	0.702511	0.975289	0.7837	0.632361
F_27708_20_R_2012_20_53_sB_A	0.749459	0.995498	0.8104	0.670323
F_27708_20_R_2012_20_53_sB_C	0.784896	0.987809	0.8287	0.670323
F_27708_20_R_2012_20_53_sB_G	0.744964	0.995413	0.808	0.670323
F_27708_20_R_2012_20_53_sB_T	0.780495	0.993876	0.8275	0.670323
F_5675_21_R_24040_20_59_sB_A	0.624962	0.990216	0.7887	0.633293
F_5675_21_R_24040_20_59_sB_G	0.604719	0.983616	0.7743	0.633293
F_23627_24_R_6107_24_19_sB_A	0.704471	0.970309	0.7995	0.636691
F_23627_24_R_6107_24_19_sB_G	0.679626	0.987358	0.7897	0.636691
F_23627_24_R_6107_24_19_sB_T	0.654349	0.987114	0.7746	0.636691
F_27057_22_R_2676_22_24_sB_A	0.707244	0.973405	0.8168	0.614207
F_27057_22_R_2676_22_24_sB_C	0.771895	0.99556	0.8365	0.614207
F_27057_22_R_2676_22_24_sB_G	0.70868	0.970261	0.8161	0.614207
F_27057_22_R_2676_22_24_sB_T	0.708692	0.974984	0.8112	0.614207
F_27057_22_R_2676_22_23_sB_A	0.669827	0.994155	0.8022	0.61474
F_27057_22_R_2676_22_23_sB_C	0.703108	0.974036	0.813	0.61474
F_27057_22_R_2676_22_23_sB_G	0.672372	0.989928	0.8032	0.61474
F_27057_22_R_2676_22_23_sB_T	0.695377	0.981918	0.8135	0.61474
F_27057_22_R_2676_22_22_sB_A	0.649189	0.997444	0.7842	0.615726
F_27057_22_R_2676_22_22_sB_G	0.647311	0.997429	0.7821	0.615726
F_27057_22_R_2676_22_22_sB_T	0.675972	0.995062	0.7953	0.615726
F_18935_21_R_10795_21_30_sB_A	0.61613	0.991333	0.7562	0.600989
F_26798_24_R_2913_20_3_sB_A	0.629149	0.99538	0.8084	0.630894
F_26798_24_R_2913_20_3_sB_G	0.624817	0.994685	0.8054	0.630894
F_26798_24_R_2913_20_2_sB_G	0.609062	0.997618	0.7929	0.613443
F_26798_24_R_2913_20_2_sB_T	0.619385	0.980788	0.7984	0.613443
F_28660_24_R_1064_20_37_sB_A	0.625388	0.99463	0.795	0.613229
F_28660_24_R_1064_20_37_sB_G	0.60707	0.995148	0.7856	0.613229
F_21569_21_R_8143_20_14_sB_A	0.604717	0.993114	0.7524	0.719933
F_17673_23_R_12055_20_41_sB_A	0.826018	0.989698	0.8414	0.617724
F_17673_23_R_12055_20_41_sB_C	0.768676	0.9943	0.8337	0.617724
F_17673_23_R_12055_20_41_sB_G	0.808519	0.984513	0.8484	0.617724
F_17673_23_R_12055_20_41_sB_T	0.77181	0.987401	0.8211	0.617724
F_17673_23_R_12055_20_40_sB_G	0.761182	0.992295	0.8288	0.600312
F_19084_24_R_10645_20_41_sB_A	0.664525	0.981823	0.8124	0.617607
F_19084_24_R_10645_20_41_sB_C	0.662945	0.976977	0.81	0.617607
F_19084_24_R_10645_20_41_sB_G	0.607526	0.994774	0.7819	0.617607
F_19084_24_R_10645_20_41_sB_T	0.663546	0.979051	0.8111	0.617607
F_22012_24_R_7676_20_49_sB_A	0.683865	0.993003	0.8213	0.629645
F_22012_24_R_7676_20_49_sB_C	0.682776	0.989266	0.8192	0.629645
F_22012_24_R_7676_20_49_sB_G	0.64979	0.995457	0.8013	0.629645
F_23627_24_R_6107_22_38_sB_A	0.651267	0.989125	0.8052	0.608119
F_23627_24_R_6107_22_38_sB_C	0.655044	0.970859	0.8041	0.608119
F_23627_24_R_6107_22_38_sB_G	0.654995	0.977906	0.8059	0.608119
F_23627_24_R_6107_22_37_sB_A	0.671321	0.977595	0.8128	0.60244
F_23627_24_R_6107_22_37_sB_C	0.666062	0.971507	0.8075	0.60244
F_23627_24_R_6107_22_37_sB_G	0.66025	0.983685	0.8067	0.60244
F_23627_24_R_6107_22_37_sB_T	0.626252	0.991605	0.7871	0.60244
F_1227_20_R_28466_20_1_sB_A	0.742116	0.979464	0.8266	0.613175
F_1227_20_R_28466_20_1_sB_C	0.728653	0.979755	0.8211	0.613175
F_1227_20_R_28466_20_1_sB_G	0.70593	0.980913	0.8107	0.613175
F_1227_20_R_28466_20_1_sB_T	0.71218	0.990919	0.8112	0.613175
F_26131_22_R_3594_23_13_sB_C	0.602015	0.991897	0.7577	0.636593
F_26131_22_R_3594_23_13_sB_G	0.600651	0.995269	0.755	0.636593
F_26131_22_R_3594_23_13_sB_T	0.616962	0.994205	0.7667	0.636593
F_5675_21_R_24040_20_56_sB_C	0.601542	0.993081	0.781	0.605496
F_9518_22_R_20199_22_7_sB_A	0.87526	0.980044	0.8739	0.602421
F_9518_22_R_20199_22_7_sB_G	0.849593	0.995739	0.8605	0.602421
F_21569_21_R_8143_20_30_sB_A	0.626979	0.996185	0.7826	0.627871
F_21569_21_R_8143_20_30_sB_C	0.640841	0.978116	0.7908	0.627871
F_21569_21_R_8143_20_30_sB_G	0.619002	0.994609	0.7796	0.627871
F_21569_21_R_8143_20_30_sB_T	0.648127	0.98811	0.7944	0.627871
F_22620_20_R_7069_20_7_sB_A	0.721579	0.990307	0.8294	0.6819
F_22620_20_R_7069_20_7_sB_C	0.704735	0.991755	0.8186	0.6819
F_22620_20_R_7069_20_7_sB_G	0.720403	0.984361	0.8279	0.6819
F_22620_20_R_7069_20_7_sB_T	0.685686	0.990081	0.8146	0.6819
F_17693_24_R_12034_23_32_sB_A	0.606188	0.990567	0.7667	0.608437
F_17693_24_R_12034_23_32_sB_G	0.606281	0.984805	0.7655	0.608437
F_9953_23_R_19767_24_22_sB_C	0.624263	0.996535	0.7545	0.69372
F_9953_23_R_19767_24_22_sB_T	0.625771	0.995643	0.7541	0.69372
F_5788_20_R_23930_22_5_sB_A	0.609634	0.993939	0.7813	0.656681
F_5788_20_R_23930_22_5_sB_G	0.607666	0.992598	0.7789	0.656681
F_5788_20_R_23930_22_5_sB_T	0.647907	0.977085	0.7961	0.656681
F_17131_24_R_12603_24_22_sB_A	0.617682	0.993474	0.7772	0.600974
F_17131_24_R_12603_24_22_sB_C	0.669469	0.980146	0.803	0.600974
F_17131_24_R_12603_24_22_sB_G	0.615139	0.99282	0.7754	0.600974
F_17131_24_R_12603_24_22_sB_T	0.675535	0.975114	0.8018	0.600974
F_27708_20_R_2005_22_63_sB_A	0.8434	0.98165	0.8635	0.615186
F_27708_20_R_2005_22_63_sB_G	0.857563	0.986126	0.8654	0.615186
F_27708_20_R_2005_22_63_sB_T	0.854727	0.984453	0.8572	0.615186
F_18935_21_R_10795_21_33_sB_A	0.619486	0.992382	0.782	0.611927
F_18935_21_R_10795_21_33_sB_C	0.656919	0.97122	0.8005	0.611927
F_18935_21_R_10795_21_33_sB_G	0.614792	0.989982	0.7719	0.611927
F_18935_21_R_10795_21_33_sB_T	0.650438	0.984382	0.7935	0.611927
F_21569_21_R_8143_20_28_sB_A	0.647343	0.997062	0.7838	0.664964
F_21569_21_R_8143_20_28_sB_G	0.654501	0.997026	0.7806	0.664964
F_21569_21_R_8143_20_28_sB_T	0.683427	0.99598	0.8102	0.664964
F_850_20_R_28881_20_42_sB_A	0.693874	0.992242	0.8215	0.636081
F_850_20_R_28881_20_42_sB_C	0.678556	0.990181	0.8121	0.636081
F_850_20_R_28881_20_42_sB_G	0.69433	0.991988	0.8215	0.636081
F_850_20_R_28881_20_42_sB_T	0.613947	0.992795	0.7768	0.636081
F_21569_21_R_8143_20_25_sB_A	0.657367	0.995436	0.8151	0.738143
F_21569_21_R_8143_20_25_sB_C	0.659939	0.984828	0.8109	0.738143
F_21569_21_R_8143_20_25_sB_G	0.659998	0.995466	0.815	0.738143
F_21569_21_R_8143_20_25_sB_T	0.6843	0.995568	0.8143	0.738143
F_23627_24_R_6107_24_22_sB_A	0.638636	0.984753	0.7841	0.607567
F_23627_24_R_6107_24_22_sB_G	0.609904	0.983599	0.7817	0.607567
F_27057_22_R_2676_22_27_sB_C	0.654452	0.984906	0.8026	0.615954
F_22620_20_R_7069_20_5_sB_A	0.799359	0.976264	0.8431	0.66161
F_22620_20_R_7069_20_5_sB_G	0.7987	0.97732	0.8433	0.66161
F_22620_20_R_7069_20_5_sB_T	0.765483	0.988983	0.8268	0.66161
F_25748_24_R_3938_22_8_sB_A	0.766658	0.977357	0.8382	0.64404
F_25748_24_R_3938_22_8_sB_G	0.746205	0.98325	0.8286	0.64404
F_25748_24_R_3938_22_8_sB_T	0.70765	0.992913	0.8089	0.64404
F_23359_22_R_6356_24_40_sB_A	0.712784	0.988983	0.8036	0.65492
F_23359_22_R_6356_24_40_sB_G	0.726159	0.991888	0.8107	0.65492
F_23359_22_R_6356_24_40_sB_T	0.67251	0.996567	0.7822	0.65492
F_26798_24_R_2913_20_4_sB_A	0.684785	0.994579	0.8182	0.637014
F_26798_24_R_2913_20_4_sB_C	0.636196	0.997439	0.7905	0.637014
F_26798_24_R_2913_20_4_sB_G	0.686253	0.994742	0.8187	0.637014
F_26798_24_R_2913_20_4_sB_T	0.633288	0.997121	0.7885	0.637014
F_21569_21_R_8143_20_16_sB_C	0.612661	0.982735	0.7538	0.728274
F_9953_23_R_19767_24_8_sB_A	0.645815	0.983645	0.7555	0.667082
F_9473_20_R_20213_22_0_sB_C	0.703253	0.989685	0.8055	0.607756
F_9473_20_R_20213_22_0_sB_T	0.6694	0.992882	0.7873	0.607756
F_27708_20_R_2012_20_57_sB_A	0.824157	0.992954	0.8609	0.70267
F_27708_20_R_2012_20_57_sB_C	0.788923	0.995445	0.842	0.70267
F_27708_20_R_2012_20_57_sB_G	0.824228	0.99287	0.8609	0.70267
F_27708_20_R_2012_20_57_sB_T	0.812221	0.987681	0.8532	0.70267
F_28933_23_R_789_20_15_sB_A	0.61685	0.989635	0.78	0.740137
F_28933_23_R_789_20_15_sB_G	0.610574	0.987937	0.7764	0.740137
F_28933_23_R_789_20_15_sB_T	0.639345	0.977515	0.7913	0.740137
F_25760_24_R_3938_22_1_sB_A	0.643064	0.984445	0.8068	0.703837
F_25760_24_R_3938_22_1_sB_C	0.642416	0.977225	0.8031	0.703837
F_25760_24_R_3938_22_1_sB_G	0.64652	0.977946	0.8039	0.703837
F_28933_23_R_789_20_18_sB_A	0.607437	0.997308	0.7712	0.745597
F_28933_23_R_789_20_18_sB_C	0.602052	0.997929	0.7711	0.745597
F_28933_23_R_789_20_18_sB_T	0.607591	0.997665	0.768	0.745597
F_28933_23_R_789_20_21_sB_A	0.655556	0.995126	0.7914	0.667833
F_28933_23_R_789_20_21_sB_C	0.675126	0.984492	0.8005	0.667833
F_28933_23_R_789_20_21_sB_G	0.651897	0.99513	0.789	0.667833
F_28933_23_R_789_20_21_sB_T	0.674257	0.978534	0.7977	0.667833
F_27708_20_R_2012_20_49_sB_A	0.691967	0.992989	0.8223	0.634209
F_27708_20_R_2012_20_49_sB_C	0.70063	0.988505	0.8223	0.634209
F_27708_20_R_2012_20_49_sB_G	0.709764	0.993017	0.8252	0.634209
F_27708_20_R_2012_20_49_sB_T	0.761936	0.992935	0.8323	0.634209
F_8930_22_R_20804_21_39_sB_A	0.700374	0.993474	0.8273	0.617518
F_8930_22_R_20804_21_39_sB_G	0.702671	0.993951	0.8162	0.617518
F_8930_22_R_20804_21_39_sB_T	0.727536	0.99179	0.8243	0.617518
F_17693_24_R_12034_23_30_sB_A	0.660942	0.988965	0.7818	0.624258
F_17693_24_R_12034_23_30_sB_C	0.649102	0.972843	0.7728	0.624258
F_17693_24_R_12034_23_30_sB_G	0.662499	0.993305	0.783	0.624258
F_17693_24_R_12034_23_30_sB_T	0.627043	0.990902	0.7629	0.624258
F_29262_20_R_430_23_67_sB_A	0.722611	0.995293	0.8248	0.638921
F_29262_20_R_430_23_67_sB_C	0.681391	0.994964	0.8088	0.638921
F_29262_20_R_430_23_67_sB_G	0.698822	0.996198	0.8188	0.638921
F_29262_20_R_430_23_67_sB_T	0.604276	0.998874	0.7708	0.638921
F_11534_20_R_18171_20_69_sB_G	0.658294	0.994483	0.785	0.648766
F_9953_23_R_19767_24_20_sB_A	0.604078	0.990075	0.7514	0.685563
F_9953_23_R_19767_24_20_sB_C	0.611693	0.978962	0.7569	0.685563
F_9953_23_R_19767_24_20_sB_G	0.611323	0.990189	0.7541	0.685563
F_9953_23_R_19767_24_20_sB_T	0.633227	0.991414	0.7734	0.685563
F_28660_24_R_1064_20_24_sB_G	0.603299	0.980477	0.7785	0.606751
F_22427_23_R_7261_22_71_sB_A	0.697042	0.990304	0.8011	0.60639
F_22427_23_R_7261_22_71_sB_C	0.694918	0.983591	0.799	0.60639
F_22427_23_R_7261_22_71_sB_G	0.698972	0.989422	0.8018	0.60639
F_22427_23_R_7261_22_71_sB_T	0.671164	0.991951	0.7869	0.60639
F_21569_21_R_8143_20_1_sB_A	0.611962	0.975159	0.7635	0.667817
F_21569_21_R_8143_20_1_sB_G	0.615387	0.980299	0.7654	0.667817
F_9953_23_R_19767_24_16_sB_A	0.716766	0.993668	0.7904	0.728451
F_9953_23_R_19767_24_16_sB_G	0.716223	0.993742	0.791	0.728451
F_9953_23_R_19767_24_16_sB_T	0.714223	0.985918	0.7944	0.728451
F_9953_23_R_19767_24_15_sB_A	0.703557	0.979556	0.786	0.729966
F_9953_23_R_19767_24_15_sB_C	0.664982	0.994895	0.7692	0.729966
F_9953_23_R_19767_24_15_sB_G	0.701854	0.986375	0.787	0.729966
F_9953_23_R_19767_24_15_sB_T	0.665599	0.994861	0.7695	0.729966
F_4665_24_R_25069_20_18_sB_T	0.648838	0.989188	0.7867	0.601473
F_23627_24_R_6107_24_16_sB_A	0.719969	0.994028	0.8242	0.637106
F_23627_24_R_6107_24_16_sB_C	0.697285	0.988089	0.8062	0.637106
F_23627_24_R_6107_24_16_sB_G	0.698966	0.994348	0.8083	0.637106
F_23627_24_R_6107_24_16_sB_T	0.631305	0.994615	0.7668	0.637106
F_11534_20_R_18176_20_61_sB_A	0.795686	0.981989	0.8353	0.619545
F_11534_20_R_18176_20_61_sB_C	0.789838	0.983615	0.8319	0.619545
F_11534_20_R_18176_20_61_sB_G	0.758054	0.991505	0.8164	0.619545
F_11534_20_R_18176_20_62_sB_C	0.769752	0.991655	0.8238	0.612504
F_11534_20_R_18176_20_62_sB_G	0.770665	0.993335	0.8244	0.612504
F_11534_20_R_18176_20_62_sB_T	0.718127	0.993436	0.7955	0.612504
F_11534_20_R_18176_20_42_sB_A	0.72024	0.99087	0.8307	0.626349
F_11534_20_R_18176_20_42_sB_C	0.697207	0.985455	0.8218	0.626349
F_11534_20_R_18176_20_42_sB_G	0.693664	0.991223	0.8229	0.626349
F_11534_20_R_18176_20_42_sB_T	0.664442	0.991181	0.8042	0.626349
F_19784_24_R_9916_21_57_sB_A	0.626593	0.993276	0.7663	0.615267
F_19784_24_R_9916_21_57_sB_C	0.662673	0.991022	0.786	0.615267
F_19784_24_R_9916_21_57_sB_G	0.628011	0.987355	0.7656	0.615267
F_19784_24_R_9916_21_57_sB_T	0.665825	0.992159	0.7879	0.615267
F_22615_22_R_7069_20_1_sB_A	0.661674	0.99413	0.8066	0.649129
F_22615_22_R_7069_20_1_sB_C	0.665261	0.97049	0.809	0.649129
F_22615_22_R_7069_20_1_sB_G	0.690532	0.98625	0.8184	0.649129
F_22615_22_R_7069_20_1_sB_T	0.687111	0.972191	0.8154	0.649129
F_21569_21_R_8143_20_10_sB_C	0.607423	0.979031	0.7543	0.693129
F_21569_21_R_8143_20_10_sB_T	0.62655	0.993398	0.7658	0.693129
F_21569_21_R_8143_20_34_sB_A	0.717072	0.997298	0.829	0.611698
F_21569_21_R_8143_20_34_sB_C	0.698076	0.99597	0.8181	0.611698
F_21569_21_R_8143_20_34_sB_G	0.715407	0.997282	0.8287	0.611698
F_21569_21_R_8143_20_34_sB_T	0.634546	0.997837	0.7829	0.611698
F_22620_20_R_7069_20_10_sB_A	0.698439	0.993242	0.8172	0.670204
F_22620_20_R_7069_20_10_sB_C	0.713379	0.971161	0.8186	0.670204
F_22620_20_R_7069_20_10_sB_G	0.717324	0.993125	0.828	0.670204
F_22620_20_R_7069_20_10_sB_T	0.721817	0.992212	0.8301	0.670204
F_9473_20_R_20213_22_46_sB_A	0.735903	0.982664	0.8039	0.620578
F_9473_20_R_20213_22_46_sB_G	0.736634	0.992296	0.806	0.620578
F_9473_20_R_20213_22_46_sB_T	0.70074	0.986577	0.7851	0.620578
F_27708_20_R_2012_20_52_sB_A	0.807103	0.996557	0.8413	0.656275
F_27708_20_R_2012_20_52_sB_C	0.790548	0.994777	0.8303	0.656275
F_27708_20_R_2012_20_52_sB_G	0.794768	0.996575	0.8331	0.656275
F_27708_20_R_2012_20_52_sB_T	0.730045	0.996609	0.7961	0.656275
F_27708_20_R_2012_20_56_sB_A	0.727227	0.97979	0.8137	0.707012
F_27708_20_R_2012_20_56_sB_C	0.768676	0.992817	0.8355	0.707012
F_27708_20_R_2012_20_56_sB_G	0.726987	0.979079	0.8134	0.707012
F_27708_20_R_2012_20_56_sB_T	0.718551	0.978526	0.8088	0.707012
F_27708_20_R_2012_20_55_sB_A	0.727886	0.991147	0.8147	0.708937
F_27708_20_R_2012_20_55_sB_C	0.724978	0.98859	0.8127	0.708937
F_27708_20_R_2012_20_55_sB_G	0.729445	0.991252	0.8155	0.708937
F_27708_20_R_2012_20_55_sB_T	0.700289	0.993855	0.7997	0.708937
F_27708_20_R_2012_20_46_sB_A	0.857048	0.982652	0.8669	0.605065
F_27708_20_R_2012_20_46_sB_G	0.836405	0.986785	0.8561	0.605065
F_27708_20_R_2012_20_46_sB_T	0.809976	0.990433	0.8428	0.605065
F_5675_21_R_24040_20_58_sB_A	0.649057	0.983865	0.8081	0.60576
F_5675_21_R_24040_20_58_sB_C	0.647337	0.979169	0.8054	0.60576
F_5675_21_R_24040_20_58_sB_G	0.648617	0.98214	0.8069	0.60576
F_5675_21_R_24040_20_58_sB_T	0.612336	0.993238	0.7833	0.60576
F_13800_21_R_15890_23_82_sB_G	0.618074	0.988905	0.7887	0.607534
F_29262_20_R_430_23_70_sB_A	0.610123	0.995262	0.7797	0.611695
F_29262_20_R_430_23_70_sB_C	0.651182	0.971428	0.8019	0.611695
F_29262_20_R_430_23_70_sB_G	0.608903	0.99017	0.7763	0.611695
F_29262_20_R_430_23_70_sB_T	0.649121	0.975903	0.8026	0.611695
F_760_24_R_28969_23_14_sB_C	0.659894	0.99751	0.7981	0.613675
F_5788_20_R_23930_22_3_sB_A	0.617071	0.996864	0.7933	0.709007
F_5788_20_R_23930_22_3_sB_C	0.643356	0.987557	0.8055	0.709007
F_5788_20_R_23930_22_3_sB_T	0.639126	0.985059	0.8022	0.709007
F_21644_24_R_8085_20_43_sB_A	0.725719	0.972126	0.8261	0.638194
F_21644_24_R_8085_20_43_sB_C	0.689202	0.994583	0.8136	0.638194
F_23627_24_R_6107_24_0_sB_C	0.65768	0.991143	0.7989	0.609905
F_23627_24_R_6107_24_0_sB_G	0.682113	0.988301	0.8142	0.609905
F_27057_22_R_2676_22_21_sB_A	0.66608	0.993669	0.7819	0.616104
F_27057_22_R_2676_22_21_sB_C	0.64013	0.997044	0.7637	0.616104
F_27057_22_R_2676_22_21_sB_G	0.676849	0.993221	0.7862	0.616104
F_27057_22_R_2676_22_21_sB_T	0.64067	0.997025	0.7639	0.616104
F_4990_24_R_24713_21_41_sB_A	0.680896	0.994934	0.7754	0.622248
F_4990_24_R_24713_21_41_sB_C	0.699832	0.99408	0.7935	0.622248
F_4990_24_R_24713_21_41_sB_G	0.683968	0.995467	0.7753	0.622248
F_4990_24_R_24713_21_41_sB_T	0.672466	0.99614	0.7767	0.622248
F_28660_24_R_1064_20_36_sB_G	0.620359	0.983285	0.7939	0.626419
F_21569_21_R_8143_20_13_sB_G	0.615943	0.996813	0.758	0.723847
F_22012_24_R_7676_20_48_sB_A	0.686462	0.98894	0.8212	0.632373
F_22012_24_R_7676_20_48_sB_C	0.68191	0.973988	0.8154	0.632373
F_22012_24_R_7676_20_48_sB_G	0.654614	0.993925	0.8038	0.632373
F_17131_24_R_12603_24_30_sB_A	0.786617	0.975505	0.8293	0.663033
F_17131_24_R_12603_24_30_sB_G	0.782984	0.983014	0.8257	0.663033
F_17131_24_R_12603_24_30_sB_T	0.753594	0.982892	0.8111	0.663033
F_17693_24_R_12034_23_27_sB_A	0.66447	0.984323	0.78	0.629008
F_17693_24_R_12034_23_27_sB_G	0.668199	0.990023	0.7824	0.629008
F_14983_22_R_14746_20_42_sB_A	0.717755	0.986805	0.8173	0.6007
F_14983_22_R_14746_20_42_sB_G	0.707816	0.987782	0.8116	0.6007
F_14983_22_R_14746_20_42_sB_T	0.646638	0.994334	0.7786	0.6007
F_5152_21_R_24552_24_15_sB_A	0.648784	0.985845	0.8079	0.644218
F_5152_21_R_24552_24_15_sB_C	0.649783	0.97935	0.8076	0.644218
F_5152_21_R_24552_24_15_sB_G	0.642313	0.989512	0.8017	0.644218
F_5152_21_R_24552_24_15_sB_T	0.621574	0.994947	0.794	0.644218
F_23627_24_R_6107_24_36_sB_A	0.681452	0.976603	0.8147	0.615642
F_23627_24_R_6107_24_36_sB_G	0.672043	0.986045	0.8071	0.615642
F_23627_24_R_6107_24_36_sB_T	0.629135	0.992556	0.7811	0.615642
F_28933_23_R_789_20_13_sB_A	0.653082	0.974525	0.7803	0.693611
F_28933_23_R_789_20_14_sB_A	0.633743	0.993228	0.7755	0.718375
F_28933_23_R_789_20_14_sB_G	0.631453	0.992977	0.7747	0.718375
F_28933_23_R_789_20_14_sB_T	0.659378	0.993111	0.7943	0.718375
F_9953_23_R_19767_24_26_sB_A	0.649058	0.978499	0.7649	0.6733
F_9953_23_R_19767_24_26_sB_C	0.655441	0.989025	0.7717	0.6733
F_9953_23_R_19767_24_26_sB_G	0.649225	0.983596	0.7667	0.6733
F_27708_20_R_2005_22_61_sB_C	0.839966	0.983059	0.8638	0.621448
F_27708_20_R_2005_22_61_sB_G	0.840532	0.992911	0.867	0.621448
F_27708_20_R_2005_22_61_sB_T	0.805297	0.994499	0.8476	0.621448
F_29255_21_R_430_23_1_sB_A	0.626937	0.994623	0.7811	0.604029
F_29255_21_R_430_23_1_sB_G	0.624498	0.994482	0.7798	0.604029
F_29255_21_R_430_23_1_sB_T	0.689716	0.978485	0.8107	0.604029
F_1227_20_R_28466_20_0_sB_A	0.734298	0.975173	0.8279	0.618178
F_1227_20_R_28466_20_0_sB_C	0.734431	0.970833	0.8288	0.618178
F_1227_20_R_28466_20_0_sB_G	0.711092	0.979653	0.821	0.618178
F_1227_20_R_28466_20_0_sB_T	0.712942	0.989541	0.8183	0.618178
F_25760_24_R_3938_22_0_sB_A	0.711845	0.984451	0.8288	0.724583
F_25760_24_R_3938_22_0_sB_C	0.714151	0.972413	0.8255	0.724583
F_25760_24_R_3938_22_0_sB_G	0.708211	0.984854	0.8253	0.724583
F_25760_24_R_3938_22_0_sB_T	0.673902	0.991725	0.8093	0.724583
F_25760_23_R_3938_22_0_sB_A	0.722608	0.99116	0.8322	0.720267
F_25760_23_R_3938_22_0_sB_C	0.72454	0.986657	0.8305	0.720267
F_25760_23_R_3938_22_0_sB_G	0.723169	0.99118	0.832	0.720267
F_25760_23_R_3938_22_0_sB_T	0.690505	0.991668	0.8143	0.720267
F_5675_21_R_24040_20_55_sB_A	0.635075	0.978847	0.7949	0.605037
F_6418_22_R_23294_22_47_sB_A	0.746082	0.975428	0.8267	0.642656
F_9518_22_R_20199_22_6_sB_A	0.835466	0.994712	0.8648	0.622103
F_9518_22_R_20199_22_6_sB_C	0.83444	0.988135	0.8622	0.622103
F_9518_22_R_20199_22_6_sB_G	0.835761	0.994736	0.8647	0.622103
F_9518_22_R_20199_22_6_sB_T	0.843028	0.995535	0.8591	0.622103
F_5675_21_R_24040_20_61_sB_A	0.690439	0.989267	0.8067	0.633405
F_5675_21_R_24040_20_61_sB_G	0.683738	0.987122	0.8027	0.633405
F_23627_22_R_6107_22_0_sB_A	0.755748	0.97861	0.8402	0.604922
F_23627_22_R_6107_22_0_sB_G	0.747957	0.976483	0.8339	0.604922
F_23627_22_R_6107_22_0_sB_T	0.73058	0.981618	0.8217	0.604922
F_28628_22_R_1096_20_10_sB_A	0.680483	0.998829	0.8168	0.653357
F_28628_22_R_1096_20_10_sB_C	0.674263	0.996808	0.8052	0.653357
F_28628_22_R_1096_20_10_sB_G	0.682208	0.998883	0.8052	0.653357
F_28628_22_R_1096_20_10_sB_T	0.635341	0.999184	0.7828	0.653357
F_11810_24_R_17919_22_43_sB_A	0.679679	0.982581	0.817	0.617421
F_11810_24_R_17919_22_43_sB_C	0.652055	0.996345	0.7964	0.617421
F_11810_24_R_17919_22_43_sB_G	0.672084	0.979475	0.8122	0.617421
F_11810_24_R_17919_22_43_sB_T	0.655069	0.994482	0.7957	0.617421
F_21569_21_R_8143_20_29_sB_A	0.682341	0.988057	0.8148	0.642686
F_21569_21_R_8143_20_29_sB_C	0.68065	0.982603	0.811	0.642686
F_21569_21_R_8143_20_29_sB_G	0.675071	0.991797	0.8067	0.642686
F_21569_21_R_8143_20_29_sB_T	0.628637	0.997885	0.7816	0.642686
F_850_20_R_28881_20_43_sB_A	0.641535	0.993844	0.7934	0.632731
F_850_20_R_28881_20_43_sB_C	0.688237	0.977137	0.8152	0.632731
F_850_20_R_28881_20_43_sB_G	0.635978	0.993342	0.7901	0.632731
F_850_20_R_28881_20_43_sB_T	0.687644	0.975316	0.8141	0.632731
F_21569_21_R_8143_20_26_sB_A	0.66302	0.972564	0.8099	0.714213
F_21569_21_R_8143_20_26_sB_C	0.627173	0.9812	0.7879	0.714213
F_21569_21_R_8143_20_26_sB_G	0.647619	0.992877	0.7991	0.714213
F_23627_22_R_6101_20_48_sB_T	0.611564	0.981358	0.7757	0.605812
F_25760_24_R_3938_22_2_sB_A	0.649312	0.992254	0.8045	0.678471
F_28933_23_R_789_20_20_sB_A	0.626052	0.998081	0.768	0.694586
F_28933_23_R_789_20_20_sB_C	0.663714	0.983014	0.7831	0.694586
F_28933_23_R_789_20_20_sB_G	0.625942	0.998062	0.7679	0.694586
F_28933_23_R_789_20_20_sB_T	0.668746	0.997328	0.7906	0.694586
F_28933_23_R_789_20_19_sB_A	0.645192	0.971486	0.7716	0.72027
F_28933_23_R_789_20_19_sB_C	0.635691	0.996435	0.7611	0.72027
F_28933_23_R_789_20_19_sB_G	0.645856	0.976948	0.7739	0.72027
F_28933_23_R_789_20_19_sB_T	0.636066	0.996429	0.7613	0.72027
F_28933_23_R_789_20_22_sB_A	0.688225	0.987318	0.8026	0.641126
F_850_20_R_28881_20_40_sB_A	0.716105	0.993933	0.8233	0.60418
F_850_20_R_28881_20_40_sB_C	0.724291	0.988901	0.8261	0.60418
F_850_20_R_28881_20_40_sB_G	0.720766	0.993399	0.8263	0.60418
F_850_20_R_28881_20_40_sB_T	0.7257	0.983779	0.8271	0.60418
F_17693_24_R_12034_23_31_sB_A	0.657256	0.990861	0.7808	0.618081
F_17693_24_R_12034_23_31_sB_C	0.646622	0.975032	0.7725	0.618081
F_17693_24_R_12034_23_31_sB_G	0.657938	0.994103	0.7817	0.618081
F_17693_24_R_12034_23_31_sB_T	0.622751	0.993026	0.7618	0.618081
F_22620_20_R_7069_20_11_sB_A	0.680995	0.981364	0.8178	0.644317
F_22620_20_R_7069_20_11_sB_C	0.672712	0.983159	0.8066	0.644317
F_22620_20_R_7069_20_11_sB_G	0.683137	0.983118	0.8176	0.644317
F_22620_20_R_7069_20_11_sB_T	0.680674	0.990684	0.8109	0.644317
F_27708_20_R_2012_20_47_sB_A	0.707022	0.975589	0.823	0.61793
F_27708_20_R_2012_20_47_sB_G	0.722697	0.974287	0.8253	0.61793
F_27708_20_R_2012_20_47_sB_T	0.688071	0.984937	0.8093	0.61793
F_5788_20_R_23930_22_4_sB_A	0.645659	0.980289	0.7947	0.681694
F_5788_20_R_23930_22_4_sB_C	0.636904	0.975555	0.7881	0.681694
F_5788_20_R_23930_22_4_sB_T	0.642932	0.978528	0.7926	0.681694
F_21644_24_R_8085_20_44_sB_A	0.710193	0.995501	0.8289	0.621107
F_21644_24_R_8085_20_44_sB_C	0.701419	0.972176	0.8182	0.621107
F_21644_24_R_8085_20_44_sB_G	0.711381	0.995525	0.8287	0.621107
F_21644_24_R_8085_20_44_sB_T	0.655757	0.995752	0.8024	0.621107
F_21644_24_R_8085_20_45_sB_A	0.691628	0.986302	0.8232	0.61449
F_21644_24_R_8085_20_45_sB_C	0.694012	0.974661	0.8198	0.61449
F_21644_24_R_8085_20_45_sB_G	0.69664	0.987491	0.8231	0.61449
F_21644_24_R_8085_20_45_sB_T	0.624475	0.993931	0.794	0.61449
F_4990_24_R_24713_21_42_sB_A	0.651086	0.99644	0.7689	0.640385
F_4990_24_R_24713_21_42_sB_C	0.685888	0.990357	0.7869	0.640385
F_4990_24_R_24713_21_42_sB_G	0.650987	0.996011	0.768	0.640385
F_4990_24_R_24713_21_42_sB_T	0.683748	0.979927	0.7821	0.640385
F_17693_24_R_12034_23_29_sB_C	0.655134	0.990482	0.7808	0.623593
F_17693_24_R_12034_23_29_sB_T	0.618846	0.992379	0.7639	0.623593
F_17693_24_R_12034_23_28_sB_A	0.61531	0.989186	0.7654	0.626086
F_17693_24_R_12034_23_28_sB_G	0.637825	0.981348	0.7647	0.626086
F_17693_24_R_12034_23_28_sB_T	0.658689	0.976766	0.775	0.626086
F_27708_20_R_2005_22_62_sB_A	0.824851	0.991979	0.8617	0.618488
F_27708_20_R_2005_22_62_sB_C	0.823154	0.985825	0.8591	0.618488
F_27708_20_R_2005_22_62_sB_G	0.828334	0.991972	0.8629	0.618488
F_27708_20_R_2005_22_62_sB_T	0.791396	0.99442	0.8428	0.618488
F_21569_21_R_8143_20_27_sB_C	0.61895	0.996105	0.7823	0.689524
F_21569_21_R_8143_20_27_sB_G	0.673266	0.98459	0.8121	0.689524
F_21569_21_R_8143_20_27_sB_T	0.615478	0.995975	0.7801	0.689524
F_17405_20_R_12317_22_6_sB_C	0.610213	0.995348	0.7609	0.622871
F_17405_20_R_12317_22_6_sB_G	0.642858	0.993241	0.7785	0.622871
F_17405_20_R_12317_22_6_sB_T	0.61091	0.995085	0.7613	0.622871
F_17405_20_R_12317_22_7_sB_A	0.631891	0.995286	0.783	0.613865
F_17405_20_R_12317_22_7_sB_G	0.632639	0.995026	0.7817	0.613865
F_6423_22_R_23311_23_39_sB_A	0.774584	0.989476	0.8281	0.717944
F_6423_22_R_23311_23_39_sB_G	0.76793	0.985599	0.8234	0.717944
F_17405_20_R_12317_22_5_sB_A	0.638156	0.991582	0.7788	0.618764
F_17405_20_R_12317_22_5_sB_C	0.635658	0.990267	0.7767	0.618764
F_17405_20_R_12317_22_5_sB_G	0.606002	0.995431	0.7604	0.618764
F_17405_20_R_12317_22_5_sB_T	0.637016	0.991012	0.7782	0.618764
F_29262_20_R_430_23_66_sB_A	0.697008	0.99786	0.8243	0.665186
F_29262_20_R_430_23_66_sB_C	0.669359	0.998596	0.8095	0.665186
F_29262_20_R_430_23_66_sB_G	0.697617	0.996988	0.8245	0.665186
F_29262_20_R_430_23_66_sB_T	0.6354	0.99094	0.7901	0.665186
F_29262_20_R_430_23_65_sB_C	0.67692	0.998887	0.8104	0.689982
F_1227_22_R_28466_20_25_sB_G	0.684937	0.992925	0.7954	0.603373
F_11534_20_R_18176_20_67_sB_A	0.644344	0.987019	0.808	0.606083
F_11534_20_R_18176_20_67_sB_G	0.653004	0.988738	0.8072	0.606083
F_11534_20_R_18176_20_67_sB_T	0.614809	0.993501	0.7888	0.606083
F_11534_20_R_18176_20_68_sB_A	0.63485	0.981511	0.8036	0.625122
F_11534_20_R_18176_20_68_sB_G	0.651623	0.985055	0.801	0.625122
F_11534_20_R_18176_20_68_sB_T	0.63915	0.989094	0.7857	0.625122
F_5788_20_R_23930_22_0_sB_C	0.662303	0.974689	0.7964	0.697929
F_7996_23_R_21734_24_34_sB_C	0.605446	0.990899	0.7661	0.608656
F_14983_22_R_14746_20_44_sB_C	0.600582	0.970354	0.7926	0.611486
F_9953_23_R_19767_24_18_sB_A	0.69876	0.986751	0.7926	0.702563
F_9953_23_R_19767_24_18_sB_C	0.677037	0.994395	0.7824	0.702563
F_9953_23_R_19767_24_18_sB_T	0.679868	0.992708	0.7829	0.702563
F_9953_23_R_19767_24_19_sB_C	0.604312	0.994704	0.7534	0.693952
F_9953_23_R_19767_24_19_sB_T	0.605912	0.994187	0.7522	0.693952
F_27057_22_R_2676_22_26_sB_A	0.647064	0.991706	0.7999	0.615015
F_27057_22_R_2676_22_26_sB_G	0.619689	0.98559	0.7873	0.615015
F_27057_22_R_2676_22_26_sB_T	0.638135	0.972101	0.7962	0.615015
F_6423_22_R_23311_23_33_sB_G	0.713623	0.985418	0.8166	0.609572
F_17673_23_R_12055_20_45_sB_A	0.656014	0.994596	0.778	0.603752
F_17673_23_R_12055_20_45_sB_C	0.642518	0.994198	0.7714	0.603752
F_17673_23_R_12055_20_45_sB_G	0.65694	0.987197	0.7776	0.603752
F_17673_23_R_12055_20_45_sB_T	0.618699	0.989678	0.7564	0.603752
F_1712_24_R_27983_22_58_sB_T	0.607135	0.983816	0.7528	0.649528
F_22620_20_R_7069_20_4_sB_A	0.756479	0.97266	0.8371	0.687619
F_22620_20_R_7069_20_4_sB_G	0.76151	0.979361	0.8356	0.687619
F_22620_20_R_7069_20_4_sB_T	0.727855	0.987023	0.8228	0.687619
F_6423_22_R_23311_23_36_sB_A	0.749468	0.981892	0.8145	0.667704
F_6423_22_R_23311_23_36_sB_G	0.740254	0.973285	0.8073	0.667704
F_1227_22_R_28466_20_24_sB_A	0.637629	0.977692	0.8013	0.610052
F_1227_22_R_28466_20_24_sB_G	0.619986	0.991645	0.7827	0.610052
F_1227_22_R_28466_20_24_sB_T	0.626579	0.97172	0.7947	0.610052
F_4232_24_R_25482_20_56_sB_A	0.609466	0.981641	0.7971	0.617936
F_4232_24_R_25482_20_56_sB_C	0.600193	0.976668	0.7905	0.617936
F_4232_24_R_25482_20_56_sB_T	0.606519	0.992269	0.7896	0.617936
F_2368_24_R_27361_20_31_sB_T	0.602013	0.976359	0.7778	0.606839
F_22620_20_R_7069_20_2_sB_A	0.69286	0.994555	0.8034	0.704256
F_22620_20_R_7069_20_2_sB_G	0.693376	0.993735	0.8019	0.704256
F_23627_24_R_6107_24_14_sB_A	0.668087	0.981248	0.7964	0.637622
F_23627_24_R_6107_24_14_sB_C	0.652651	0.983418	0.7821	0.637622
F_23627_24_R_6107_24_14_sB_G	0.667369	0.990332	0.7941	0.637622
F_23627_24_R_6107_24_14_sB_T	0.632754	0.99425	0.7698	0.637622
F_21569_21_R_8143_20_33_sB_A	0.697374	0.985498	0.8235	0.614381
F_21569_21_R_8143_20_33_sB_C	0.684806	0.997485	0.8136	0.614381
F_21569_21_R_8143_20_33_sB_G	0.703589	0.982688	0.8236	0.614381
F_21569_21_R_8143_20_33_sB_T	0.662571	0.984501	0.8024	0.614381
F_9518_22_R_20199_22_2_sB_A	0.684885	0.988412	0.7907	0.635713
F_9518_22_R_20199_22_2_sB_C	0.684829	0.988387	0.7906	0.635713
F_9518_22_R_20199_22_2_sB_G	0.684828	0.994072	0.7919	0.635713
F_9518_22_R_20199_22_2_sB_T	0.649637	0.994063	0.7721	0.635713
F_9518_22_R_20199_22_3_sB_A	0.67398	0.987957	0.7889	0.633876
F_9518_22_R_20199_22_3_sB_C	0.673802	0.986554	0.7885	0.633876
F_9518_22_R_20199_22_3_sB_G	0.67389	0.987165	0.7886	0.633876
F_9518_22_R_20199_22_3_sB_T	0.673832	0.984557	0.7879	0.633876
F_23627_24_R_6107_24_27_sB_A	0.60015	0.993655	0.7864	0.609333
F_23627_24_R_6107_24_27_sB_T	0.702322	0.994225	0.8035	0.609333
F_23627_24_R_6107_24_26_sB_T	0.674787	0.973177	0.7961	0.613267
F_8408_22_R_21310_20_1_sB_A	0.612653	0.992562	0.7912	0.608552
F_8408_22_R_21310_20_0_sB_A	0.615563	0.984605	0.7927	0.613834
F_8408_22_R_21310_20_0_sB_G	0.607594	0.987215	0.7956	0.613834
F_27708_20_R_2012_20_54_sB_C	0.71715	0.991092	0.8117	0.689411
F_27708_20_R_2012_20_54_sB_T	0.683562	0.994819	0.7937	0.689411
F_23627_24_R_6107_24_20_sB_G	0.691562	0.992726	0.7904	0.630541
F_23627_24_R_6107_24_20_sB_T	0.669848	0.973805	0.7843	0.630541
F_27057_22_R_2676_22_28_sB_C	0.639389	0.98055	0.7933	0.61822
F_27057_22_R_2676_22_28_sB_T	0.63522	0.977285	0.7905	0.61822
F_23359_22_R_6356_24_42_sB_C	0.649803	0.99597	0.7833	0.653798
F_23359_22_R_6356_24_42_sB_T	0.64829	0.993036	0.7815	0.653798
F_23359_22_R_6356_24_41_sB_A	0.649332	0.997184	0.7847	0.654465
F_23359_22_R_6356_24_41_sB_G	0.64898	0.996735	0.7845	0.654465
F_23632_20_R_6102_21_40_sB_G	0.631106	0.979659	0.8046	0.678347
F_23632_20_R_6102_21_39_sB_A	0.645094	0.990585	0.8084	0.680164
F_23632_20_R_6102_21_39_sB_C	0.630199	0.971151	0.7954	0.680164
F_23632_20_R_6102_21_39_sB_G	0.64534	0.990555	0.8085	0.680164
F_19784_24_R_9916_21_56_sB_A	0.645729	0.977712	0.7769	0.600225
F_19784_24_R_9916_21_56_sB_C	0.645858	0.982195	0.7782	0.600225
F_19784_24_R_9916_21_56_sB_T	0.645901	0.980945	0.778	0.600225
F_12013_21_R_17699_24_57_sB_A	0.638031	0.994963	0.7948	0.605498
F_12013_21_R_17699_24_57_sB_C	0.601845	0.995415	0.7772	0.605498
F_12013_21_R_17699_24_57_sB_G	0.636879	0.99097	0.8	0.605498
F_12013_21_R_17699_24_57_sB_T	0.60143	0.994912	0.7727	0.605498
F_10974_20_R_18734_22_68_sB_G	0.690209	0.987607	0.7892	0.602266
F_21644_24_R_8082_21_47_sB_A	0.616952	0.985134	0.7974	0.608432
F_21644_24_R_8082_21_47_sB_G	0.618483	0.98464	0.7972	0.608432
F_11534_20_R_18171_20_70_sB_G	0.657538	0.993906	0.7856	0.628653
F_11534_20_R_18171_20_71_sB_A	0.690177	0.990667	0.8071	0.612455
F_11534_20_R_18171_20_71_sB_C	0.69728	0.993875	0.8092	0.612455
F_11534_20_R_18171_20_71_sB_G	0.694098	0.989486	0.8089	0.612455
F_11534_20_R_18171_20_71_sB_T	0.66952	0.993272	0.7942	0.612455
F_23332_20_R_6389_24_52_sB_G	0.612208	0.992893	0.7855	0.616739
F_23332_20_R_6389_24_52_sB_T	0.623617	0.982785	0.7935	0.616739
F_6980_22_R_22739_20_56_sB_G	0.602951	0.983493	0.7916	0.633506
F_23627_24_R_6107_24_17_sB_A	0.654951	0.992962	0.7903	0.641146
F_23627_24_R_6107_24_17_sB_C	0.690722	0.974015	0.8042	0.641146
F_23627_24_R_6107_24_17_sB_G	0.643485	0.990492	0.7741	0.641146
F_23627_24_R_6107_24_17_sB_T	0.676548	0.985896	0.7933	0.641146
F_19784_24_R_9916_21_58_sB_A	0.642105	0.992239	0.7797	0.63628
F_19784_24_R_9916_21_58_sB_C	0.642182	0.992376	0.7793	0.63628
F_19784_24_R_9916_21_58_sB_T	0.641977	0.992234	0.7797	0.63628
F_21569_21_R_8143_20_11_sB_A	0.617034	0.995995	0.7589	0.69381
F_21569_21_R_8143_20_11_sB_G	0.618387	0.995833	0.759	0.69381
F_21569_21_R_8143_20_11_sB_T	0.620865	0.993207	0.7606	0.69381
F_13800_21_R_15890_23_83_sB_T	0.632196	0.988461	0.7925	0.603238
F_21569_21_R_8143_20_7_sB_A	0.621925	0.981942	0.7888	0.704717
F_21569_21_R_8143_20_7_sB_C	0.656716	0.993987	0.7858	0.704717
F_21569_21_R_8143_20_7_sB_G	0.629689	0.988124	0.7741	0.704717
F_21569_21_R_8143_20_7_sB_T	0.651794	0.992875	0.7818	0.704717
F_23627_24_R_6107_24_1_sB_A	0.670589	0.994038	0.8087	0.607842
F_23627_24_R_6107_24_1_sB_G	0.636499	0.9941	0.7878	0.607842
F_22954_21_R_6738_20_82_sB_A	0.625865	0.991177	0.7953	0.609252
F_29262_20_R_430_23_69_sB_C	0.658673	0.981705	0.7973	0.624055
F_29262_20_R_430_23_69_sB_T	0.658034	0.986527	0.7986	0.624055
F_5152_21_R_24552_24_12_sB_A	0.630811	0.974495	0.8021	0.604424
F_5152_21_R_24552_24_12_sB_T	0.626174	0.970423	0.7986	0.604424
F_22620_20_R_7069_20_13_sB_A	0.619001	0.994274	0.7943	0.602603
F_22620_20_R_7069_20_13_sB_C	0.649681	0.986275	0.8087	0.602603
F_22620_20_R_7069_20_13_sB_G	0.65289	0.99369	0.8127	0.602603
F_22620_20_R_7069_20_13_sB_T	0.651596	0.992857	0.8118	0.602603
F_5788_20_R_23930_22_2_sB_A	0.623288	0.988417	0.8011	0.702322
F_14983_22_R_14746_20_45_sB_G	0.689705	0.992382	0.8109	0.602825
F_28665_20_R_1031_20_57_sB_A	0.616524	0.994988	0.7585	0.63076
F_17673_23_R_12055_20_46_sB_A	0.760717	0.982645	0.8194	0.60685
F_17673_23_R_12055_20_46_sB_C	0.758192	0.984019	0.812	0.60685
F_17673_23_R_12055_20_46_sB_G	0.758326	0.982329	0.8107	0.60685
F_17673_23_R_12055_20_46_sB_T	0.736409	0.986231	0.8073	0.60685
F_21569_21_R_8143_20_21_sB_A	0.627639	0.993366	0.7714	0.756304
F_21569_21_R_8143_20_21_sB_G	0.621425	0.992277	0.7689	0.756304
F_17673_23_R_12055_20_42_sB_A	0.798587	0.994055	0.8494	0.617517
F_17673_23_R_12055_20_42_sB_C	0.806247	0.983755	0.8416	0.617517
F_17673_23_R_12055_20_42_sB_G	0.812079	0.994007	0.8438	0.617517
F_17673_23_R_12055_20_42_sB_T	0.770185	0.994054	0.8332	0.617517
F_17673_23_R_12055_20_43_sB_A	0.806473	0.977422	0.8423	0.622482
F_17673_23_R_12055_20_43_sB_G	0.754343	0.988944	0.828	0.622482
F_17673_23_R_12055_20_43_sB_T	0.801709	0.971308	0.8254	0.622482
F_4990_24_R_24713_21_38_sB_A	0.614149	0.984431	0.7525	0.62639
F_4990_24_R_24713_21_38_sB_G	0.687388	0.984391	0.7783	0.62639
F_4990_24_R_24713_21_38_sB_T	0.654762	0.989411	0.7787	0.62639
F_4990_24_R_24713_21_39_sB_A	0.696967	0.978722	0.779	0.61097
F_4990_24_R_24713_21_39_sB_G	0.749348	0.988351	0.7916	0.61097
F_9953_23_R_19767_24_17_sB_A	0.758959	0.993305	0.8074	0.705741
F_9953_23_R_19767_24_17_sB_G	0.759496	0.993135	0.8076	0.705741
F_9953_23_R_19767_24_17_sB_T	0.784255	0.985968	0.8222	0.705741
F_11534_20_R_18176_20_63_sB_A	0.712507	0.993164	0.8128	0.600218
F_11534_20_R_18176_20_63_sB_C	0.710402	0.994109	0.8118	0.600218
F_11534_20_R_18176_20_63_sB_G	0.708959	0.994143	0.8113	0.600218
F_11534_20_R_18176_20_63_sB_T	0.673167	0.994832	0.7911	0.600218
F_9953_23_R_19767_24_14_sB_C	0.644891	0.989178	0.7658	0.729013
F_3012_23_R_26720_20_13_sB_C	0.687407	0.972039	0.8168	0.623319
F_3012_23_R_26720_20_13_sB_G	0.612903	0.990332	0.7794	0.623319
F_3012_23_R_26720_20_13_sB_T	0.653794	0.992277	0.8028	0.623319
F_26928_21_R_2793_21_40_sB_A	0.677803	0.997005	0.8086	0.60625
F_26928_21_R_2793_21_40_sB_C	0.663174	0.995835	0.7986	0.60625
F_26928_21_R_2793_21_40_sB_G	0.666392	0.996863	0.799	0.60625
F_1712_24_R_27983_22_64_sB_A	0.610271	0.973635	0.7938	0.611004
F_28665_20_R_1031_20_55_sB_T	0.60536	0.995467	0.7541	0.630065
F_22615_22_R_7069_20_0_sB_A	0.634785	0.99445	0.8074	0.648114
F_22615_22_R_7069_20_0_sB_C	0.610071	0.990296	0.7944	0.648114
F_22615_22_R_7069_20_0_sB_G	0.638116	0.994466	0.8084	0.648114
F_21644_24_R_8086_22_42_sB_A	0.707959	0.982834	0.8269	0.628964
F_21644_24_R_8086_22_42_sB_G	0.708782	0.98305	0.8266	0.628964
F_21644_24_R_8086_22_42_sB_T	0.682587	0.991116	0.8114	0.628964
F_27057_22_R_2676_22_25_sB_A	0.750308	0.986176	0.8353	0.614181
F_27057_22_R_2676_22_25_sB_G	0.748417	0.988028	0.8343	0.614181
F_27057_22_R_2676_22_25_sB_T	0.713215	0.99023	0.8092	0.614181
F_23627_22_R_6107_22_1_sB_G	0.664663	0.985875	0.7937	0.624318
F_3012_23_R_26720_20_10_sB_T	0.683442	0.990131	0.8131	0.64377
F_2368_24_R_27361_20_32_sB_A	0.669613	0.98911	0.7983	0.621531
F_2368_24_R_27361_20_32_sB_C	0.672814	0.992643	0.7972	0.621531
F_2368_24_R_27361_20_32_sB_G	0.673716	0.987525	0.8012	0.621531
F_2368_24_R_27361_20_32_sB_T	0.643392	0.992178	0.7813	0.621531
F_14095_22_R_15637_20_19_sB_T	0.612658	0.987105	0.7579	0.62355
F_21569_21_R_8143_20_9_sB_A	0.624824	0.994016	0.7686	0.697327
F_21569_21_R_8143_20_9_sB_C	0.620936	0.98768	0.7651	0.697327
F_21569_21_R_8143_20_9_sB_G	0.600025	0.9971	0.7526	0.697327
F_21569_21_R_8143_20_9_sB_T	0.618581	0.992912	0.7642	0.697327
F_21569_21_R_8143_20_8_sB_G	0.612257	0.996454	0.7557	0.701245
F_21569_21_R_8143_20_8_sB_T	0.621322	0.995367	0.7662	0.701245
F_21569_21_R_8143_20_23_sB_A	0.606805	0.993263	0.7736	0.761
F_21569_21_R_8143_20_23_sB_C	0.619929	0.994893	0.7915	0.761
F_21569_21_R_8143_20_23_sB_G	0.602037	0.99318	0.7711	0.761
F_21569_21_R_8143_20_23_sB_T	0.62299	0.994284	0.7812	0.761
F_21569_21_R_8143_20_22_sB_A	0.603406	0.994107	0.7636	0.758904
F_21569_21_R_8143_20_22_sB_G	0.601955	0.994127	0.7627	0.758904
F_17673_23_R_12055_20_44_sB_C	0.737237	0.990603	0.8128	0.6184
F_17673_23_R_12055_20_44_sB_G	0.742753	0.993099	0.8119	0.6184
F_17673_23_R_12055_20_44_sB_T	0.729635	0.993222	0.8163	0.6184
F_22620_20_R_7069_20_3_sB_T	0.778981	0.972099	0.8266	0.701241
F_26131_22_R_3594_23_15_sB_A	0.601203	0.993049	0.7684	0.630776
F_21569_21_R_8143_20_12_sB_A	0.618907	0.995043	0.7596	0.709308
F_22427_23_R_7261_22_80_sB_T	0.63915	0.987442	0.7797	0.604595
F_1712_24_R_27983_22_56_sB_C	0.6377	0.97728	0.7711	0.606686
F_1712_24_R_27983_22_56_sB_T	0.654756	0.97745	0.7806	0.606686
F_4990_24_R_24713_21_44_sB_C	0.616837	0.970802	0.7634	0.663964
F_5152_21_R_24552_24_13_sB_A	0.615395	0.992765	0.7994	0.626641
F_2476_23_R_27257_24_18_sB_T	0.607207	0.976981	0.77	0.612258
F_6423_22_R_23311_23_35_sB_A	0.729772	0.976664	0.8037	0.651115
F_6423_22_R_23311_23_35_sB_G	0.719867	0.973179	0.7977	0.651115
F_17673_23_R_12055_20_47_sB_A	0.702531	0.98231	0.7911	0.619884
F_17673_23_R_12055_20_47_sB_C	0.696751	0.974382	0.785	0.619884
F_17673_23_R_12055_20_47_sB_G	0.675891	0.986849	0.7808	0.619884
F_17673_23_R_12055_20_47_sB_T	0.675129	0.979634	0.7779	0.619884
F_23627_24_R_6107_24_34_sB_A	0.741332	0.971038	0.8315	0.615731
F_23627_24_R_6107_24_34_sB_T	0.710439	0.988781	0.8177	0.615731
F_1227_22_R_28466_20_23_sB_G	0.612848	0.972968	0.7857	0.615765
F_1227_22_R_28466_20_23_sB_T	0.603076	0.989938	0.788	0.615765
F_28660_24_R_1064_20_26_sB_G	0.603239	0.988835	0.7743	0.637555
F_2368_24_R_27361_20_33_sB_A	0.61436	0.995204	0.794	0.639024
F_2368_24_R_27361_20_33_sB_G	0.606794	0.994967	0.7976	0.639024
F_5176_20_R_24553_22_0_sB_A	0.604952	0.987281	0.7838	0.60189
F_5176_20_R_24553_22_0_sB_G	0.625167	0.979253	0.7931	0.60189
F_5152_21_R_24552_24_14_sB_C	0.606463	0.974884	0.7882	0.636322
F_5152_21_R_24552_24_14_sB_G	0.602099	0.997909	0.7931	0.636322
F_5152_21_R_24552_24_14_sB_T	0.600638	0.997207	0.7923	0.636322
F_23627_24_R_6107_24_35_sB_A	0.696964	0.970609	0.8146	0.610315
F_23627_24_R_6107_24_35_sB_G	0.701278	0.977359	0.8156	0.610315
F_23627_24_R_6107_24_35_sB_T	0.686906	0.986869	0.8087	0.610315
F_1712_24_R_27983_22_61_sB_A	0.640799	0.99076	0.7847	0.638666
F_1712_24_R_27983_22_61_sB_C	0.640144	0.990815	0.7844	0.638666
F_1712_24_R_27983_22_61_sB_G	0.639574	0.989374	0.7837	0.638666
F_1712_24_R_27983_22_61_sB_T	0.60555	0.991341	0.7651	0.638666
F_28933_23_R_789_20_12_sB_A	0.625989	0.988017	0.7758	0.673866
F_28933_23_R_789_20_12_sB_G	0.627187	0.988053	0.7755	0.673866
F_14559_24_R_15148_20_44_sB_G	0.602662	0.973513	0.7997	0.637821
F_14559_24_R_15148_20_42_sB_C	0.601319	0.975499	0.7907	0.635999
F_14559_24_R_15148_20_42_sB_T	0.615261	0.991741	0.802	0.635999

## Sheet: 2C
Sensor1 trigger sensitivity titration
0 copies	1013 copies	1012 copies	1011 copies	1010 copies	108 copies	106 copies	104 copies
1	5.23485	1.98232	1.47727	0.883838	0.835859	0.924242	0.929293
1	7.67278	2.02446	0.785933	1.30581	1.13456	1.02752	0.987768

## Sheet: 2D
Sensor10 trigger sensitivity titration
0 copies	1013 copies	1012 copies	1011 copies	1010 copies	108 copies	106 copies	104 copies
1	14.5714	2.04633	1.26641	1.2471	1.3668	1.18533	1.37066
1	8.38726	1.38038	0.79346	1.10327	0.967298	0.891566	0.888124

## Sheet: 2E
Sensor12 trigger sensitivity titration
0 copies	1013 copies	1012 copies	1011 copies	1010 copies	108 copies	106 copies	104 copies
1	16.2232	4.18261	0.881159	0.849275	0.823188	1.08406	0.518841
1	14.3852	4.8852	1.32143	0.90051	0.852041	0.890306	0.933673

## Sheet: 2F
Sensor17 trigger sensitivity titration
0 copies	1013 copies	1012 copies	1011 copies	1010 copies	108 copies	106 copies	104 copies
1	33.2694	19.1658	1.59585	1.09326	1.00518	1.1399	1.2228
1	35.65	13.2625	1.11667	0.641667	0.625	0.941667	0.625
