# Supplementary material for: Engineered RNA biosensors enable ultrasensitive SARS-CoV-2 detection in a simple color and luminescence assay
Source: Life Sci Alliance. 2021 Sep 30;4(12):e202101213. doi: 10.26508/lsa.202101213 (PMC8500229; doi:10.26508/lsa.202101213)
Supplement: Supplementary file 5 [file LSA-2021-01213_SdataF4.xlsx]

## Sheet: 4B
Sensor12 lacZ reporter sensitivity kinetics
Time (min)	Off state	106 copies	105 copies	104 copies	103 copies	102 copies	10 copies	0 copies	1013 copies of trigger RNA
0	-0.001	0.0092	0.0039	0.0146	0.0065	0.0124	0.0119	0.012	-0.0025
5	0.0007	0.0121	0.0046	0.0152	0.0066	0.015	0.0153	0.0126	-0.0044
10	0.0026	0.0106	0.0038	0.0138	0.007	0.0133	0.0147	0.012	-0.0038
15	0.0033	0.0105	0.0037	0.0147	0.0059	0.0131	0.0151	0.0112	-0.002
20	0.0059	0.0112	0.0058	0.0152	0.007	0.015	0.016	0.0119	0.0018
25	0.0109	0.0182	0.0121	0.0198	0.0114	0.0168	0.016	0.0142	0.0181
30	0.0186	0.0403	0.0315	0.0318	0.0193	0.0229	0.0172	0.0156	0.062
35	0.0295	0.0876	0.0712	0.0564	0.0343	0.0346	0.015	0.0164	0.1649
40	0.047	0.1792	0.1453	0.1051	0.0636	0.0652	0.0257	0.0288	0.3566
45	0.0663	0.3189	0.2582	0.1762	0.1056	0.1025	0.0321	0.0373	0.6675
50	0.0897	0.5185	0.4206	0.2777	0.1637	0.1558	0.0394	0.0481	1.123
55	0.1147	0.7903	0.6357	0.4132	0.2395	0.2235	0.0466	0.0595	1.7217
60	0.1443	1.1427	0.915	0.5905	0.3401	0.3101	0.0575	0.0743	2.4413
65	0.1731	1.5535	1.2454	0.792	0.4609	0.4023	0.06	0.083	3.2055
70	0.2075	2.0574	1.6572	1.0679	0.6109	0.5398	0.078	0.1033	3.9682
75	0.243	2.6019	2.1112	1.3704	0.7866	0.6836	0.0902	0.1211	4.2169
80	0.2792	3.1581	2.604	1.7092	0.987	0.8459	0.1035	0.1392	4.3876
85	0.3169	3.7246	3.1153	2.0775	1.2141	1.0263	0.1142	0.157	4.7925
90	0.3557	4.1468	3.6358	2.4707	1.4662	1.2227	0.1288	0.1768	4.409
95	0.3929	4.3803	4.0259	2.8435	1.7396	1.407	0.1352	0.1915	4.664
100	0.4366	4.6183	4.3737	3.283	2.0338	1.6575	0.1556	0.216	4.3062
105	0.4769	4.6602	4.5799	3.6945	2.3402	1.8908	0.1702	0.2366	4.5789
110	0.5195	4.4707	4.7585	3.9801	2.6665	2.1315	0.1849	0.2581	4.5003
115	0.5615	4.3882	4.4807	4.412	2.9891	2.3792	0.2009	0.2803	4.9186
120	0.6038	4.3065	4.7158	4.3741	3.3054	2.6254	0.2159	0.3016	4.3728
125	0.641	4.4977	4.335	4.4725	3.5979	2.8264	0.2231	0.3182	4.473
130	0.686	4.7555	4.5168	4.5647	3.9069	3.1131	0.2447	0.3448	4.4381
135	0.7281	4.6103	4.7768	4.5381	4.1855	3.3485	0.2596	0.3662	4.3622
140	0.7691	4.7159	4.8456	4.7936	4.3355	3.6003	0.2743	0.3893	4.3352
145	0.8115	4.7163	4.6988	4.7148	4.6909	3.7686	0.2897	0.4109	4.3795
150	0.8512	4.6543	4.7021	4.6601	4.667	3.9331	0.3033	0.4319	4.5327

## Sheet: 4C
Sensor12 nanolantern reporter sensitivity kinetics
Time (min)	Off state	106 copies	105 copies	104 copies	103 copies	102 copies	10 copies	0 copies
0	373.99	258.69	118.09	232.99	128.29	115.09	142.89	181.69
5	1220.3	1390.3	880.3	767.8	586.7	555.8	401.6	586.2
10	2967.8	5878.8	4167.8	3687.8	2182.8	1793.8	848.8	1538.8
15	6999.1	23756.1	17946.1	15786.1	9057.1	6315.1	2203.1	4446.1
20	12782.5	55952.5	44212.5	41642.5	24732.5	16242.5	4308.5	7897.5
25	17858	88988	76028	73218	45748	31138	7355	10878
30	20829	110539	98599	100339	65479	46809	9769	12289
35	22225	114305	111705	116205	80515	59985	12575	11235
40	22433	104713	112513	118213	89153	70393	14753	10073
45	21206	83296	102666	108566	90476	75996	15936	9636
50	19735	60355	86155	91595	86475	77715	16195	9185
55	17734	40664	67414	71634	78134	74974	15974	8734
60	16910	27210	49380	53130	67070	67620	16770	8930
65	16067	17887	34767	37307	55507	60447	15217	8615
70	14802	12932	23832	26602	44092	51632	14672	9052
75	14235	9615	16455	19465	34315	43495	13485	9235
80	13114	8045	11834	14634	27004	35404	12894	9294
85	12622	6053	8701	10682	20812	29082	11522	9202
90	11964.6	5090.6	6732.6	8921.6	16304.6	22934.6	10664.6	8978.6
95	11322.7	4288.7	4915.7	6998.7	12782.7	18312.7	10302.7	8738.7
100	10528.2	3574.2	3597.2	5601.2	10358.2	14618.2	9398.2	8825.2
105	9996.6	3184.6	3016.6	4466.6	8681.6	11676.6	8711.6	8492.6
110	9663.4	2948.4	2114.4	3620.4	6708.4	9783.4	8248.4	7978.4

## Sheet: 4D
Sensor12 nanolantern luminescence fold change at 35 minutes
	106 copies			105 copies			104 copies			103 copies			102 copies			10 copies			0 copies
Fold Change against NTC at 35min	10.174	10.2733	13.5983	9.94259	13.6951	15.5246	10.3431	9.72189	14.3802	7.16644	9.09085	11.9439	5.33912	9.89201	6.583	1.11927	2.00229	2.04816	1	1	1
