# Supplementary material for: Engineered RNA biosensors enable ultrasensitive SARS-CoV-2 detection in a simple color and luminescence assay
Source: Life Sci Alliance. 2021 Sep 30;4(12):e202101213. doi: 10.26508/lsa.202101213 (PMC8500229; doi:10.26508/lsa.202101213)
Supplement: Supplementary file 6 [file LSA-2021-01213_SdataF5.xlsx]

## Sheet: 5A
Sensor 12 LacZ patient samples kinetics
Time (min)	Ct 16.05	Ct 17.71	Ct_20.8	Ct 23.07	Ct 23.70	Ct 25.44	Ct_26.07	Ct_27.91	Ct 28.75	Ct 29.76	Ct_30.16	Ct 31.00	Ct 32.06	Ct 32.92	Ct 33.87	Ct 34.58	Ct 35.73	Ct 36.60	Ct 37.61	Ct 38.72	Neg_1	Neg_2	Neg_3	Neg_4	Neg_5	Neg_6	Neg_7	Neg_8	Neg_9	Neg_10	Neg_11	Neg_12	Neg_13	Neg_14	Neg_15	Neg_16	Neg_17	Neg_18	Neg_19	Neg_20	Neg_21	Neg_22	Neg_23	Neg_24	Neg_25	Neg_26	Neg_27
0	0	0	0.0038	0	0	0	0.0042	0.0045	0	0	0.0089	0	0	0	0	0	0	0	0.01	0.01	0	0	0	0	0.02	0.02	0.02	0.02	0.02	0.02	0.02	0.02	0.02	0.03	0.03	0.03	0.03	0.04	0.04	0.04	0.04	0.04	0.04	0.0423	0.0349	0.038	0.0377
5	0.01	0.01	0.003	0	0.01	0.01	0.0025	0.0033	0.01	0.01	0.0018	0.01	0.01	0.01	0.01	0	0.01	0.01	0.01	0.01	0	0.01	0	0.01	0	0	0	0	0	0	0	0	0	0	0	0	0	0.01	0.01	0.01	0.01	0.01	0.01	0.0082	0.0015	0.0036	0.0027
10	0.01	0.01	0.0001	0	0.01	0.01	0	0	0.01	0.01	0.001	0.01	0.01	0.01	0.01	0	0.01	0.01	0.01	0.01	0	0.01	0	0.01	0	0	0	0	0	0	0	0	0	0	0	0	0	0.01	0.01	0.01	0.01	0.01	0.01	0.0055	0.0005	0.0013	0.001
15	0.01	0.01	0.0003	0.01	0.01	0.01	0.0017	0.0008	0.01	0.01	0	0.01	0.01	0	0.01	0	0	0.01	0.01	0.01	0	0	0.01	0.01	0	0	0	0	0	0	0	0	0	0	0	0	0	0	0	0	0	0	0	0.0052	0.0009	0.0015	0.0011
20	0.02	0.02	0	0.01	0.01	0.01	0.001	0.0003	0.01	0.01	0.0018	0.01	0.01	0	0.01	0	0	0.01	0.01	0	0	0.01	0.01	0.02	0	0	0	0	0	0	0	0	0	0	0	0	0	0	0	0	0	0	0	0.0037	0.0003	0.0015	0.0007
25	0.05	0.05	0.0043	0.02	0.03	0.03	0.0044	0.0009	0.01	0.03	0.0024	0.01	0.01	0	0.02	0.01	0.01	0.01	0.01	0	0.01	0.01	0.02	0.02	0.01	0.01	0.01	0	0	0	0.01	0	0.01	0	0	0	0	0	0	0	0	0	0	0.0022	0	0.0006	0.0001
30	0.16	0.13	0.0212	0.07	0.09	0.07	0.0156	0.009	0.03	0.08	0.0114	0.03	0.02	0.01	0.03	0.02	0.01	0.02	0.01	0.01	0.02	0.02	0.02	0.03	0.01	0.01	0.01	0.01	0.01	0.01	0.01	0.01	0.01	0	0	0	0	0	0	0	0	0	0	0.0009	0.0004	0	0
35	0.36	0.29	0.0555	0.16	0.2	0.15	0.0418	0.0275	0.06	0.18	0.0349	0.04	0.03	0.02	0.04	0.04	0.02	0.02	0	0	0.01	0.01	0.01	0.02	0.04	0.03	0.03	0.03	0.03	0.03	0.03	0.03	0.03	0.03	0.03	0.03	0.03	0.03	0.03	0.03	0.03	0.03	0.03	0.0333	0.0352	0.0342	0.0345
40	0.72	0.59	0.1151	0.36	0.44	0.32	0.0891	0.0582	0.15	0.4	0.0662	0.08	0.06	0.06	0.1	0.1	0.06	0.04	0.01	0.01	0.04	0.04	0.04	0.05	0.03	0.03	0.03	0.03	0.03	0.03	0.03	0.03	0.03	0.01	0.01	0.01	0.01	0.01	0	0	0	0	0	0.0016	0.0057	0.0033	0.0036
45	1.25	1.03	0.2033	0.67	0.79	0.58	0.1593	0.1053	0.26	0.71	0.118	0.14	0.09	0.11	0.16	0.16	0.1	0.05	0.01	0.02	0.05	0.06	0.05	0.06	0.05	0.04	0.04	0.04	0.05	0.04	0.05	0.04	0.04	0.01	0.01	0.01	0.01	0.01	0	0.01	0.01	0	0.01	0.0003	0.008	0.004	0.0048
50	1.95	1.63	0.3263	1.11	1.28	0.96	0.2606	0.1705	0.43	1.15	0.194	0.21	0.14	0.18	0.24	0.25	0.15	0.07	0.02	0.02	0.07	0.08	0.07	0.07	0.06	0.06	0.06	0.06	0.06	0.05	0.06	0.06	0.06	0.02	0.02	0.02	0.02	0.01	0.01	0.01	0.01	0.01	0.01	0	0.011	0.0065	0.0062
55	2.8	2.39	0.4885	1.71	1.93	1.46	0.3963	0.2562	0.66	1.73	0.2953	0.31	0.2	0.27	0.36	0.37	0.22	0.09	0.02	0.03	0.09	0.1	0.08	0.08	0.08	0.07	0.08	0.07	0.08	0.07	0.08	0.08	0.08	0.02	0.02	0.02	0.02	0.02	0.01	0.01	0.01	0.01	0.02	0.0001	0.0151	0.0083	0.0088
60	3.77	3.26	0.6956	2.45	2.71	2.1	0.5751	0.3654	0.96	2.42	0.428	0.43	0.27	0.41	0.5	0.51	0.32	0.11	0.02	0.03	0.11	0.12	0.1	0.1	0.1	0.09	0.1	0.09	0.1	0.09	0.1	0.1	0.1	0.02	0.03	0.03	0.03	0.02	0.02	0.02	0.02	0.02	0.02	0.0006	0.0195	0.0114	0.0119
65	4.43	4.2	0.9489	3.28	3.54	2.8	0.796	0.5017	1.3	3.14	0.5976	0.58	0.35	0.56	0.64	0.67	0.42	0.12	0.02	0.03	0.12	0.12	0.09	0.09	0.13	0.13	0.13	0.13	0.14	0.12	0.14	0.13	0.14	0.05	0.06	0.06	0.06	0.05	0.05	0.05	0.05	0.05	0.05	0.0366	0.06	0.0493	0.0496
70	5.74	5.03	1.2567	4.13	4.3	3.56	1.0733	0.6606	1.77	3.98	0.7969	0.78	0.47	0.78	0.87	0.9	0.57	0.15	0.03	0.04	0.16	0.16	0.13	0.12	0.14	0.14	0.14	0.14	0.15	0.13	0.15	0.14	0.15	0.03	0.04	0.04	0.04	0.04	0.02	0.03	0.03	0.03	0.03	0.0033	0.0305	0.0176	0.0187
75	5.74	4.87	1.6148	4.87	4.75	4.12	1.4012	0.8517	2.26	4.28	1.0424	1	0.59	1.03	1.1	1.13	0.73	0.18	0.04	0.05	0.19	0.19	0.14	0.14	0.16	0.16	0.16	0.16	0.17	0.15	0.17	0.17	0.17	0.04	0.04	0.04	0.05	0.04	0.03	0.03	0.03	0.03	0.04	0.005	0.0371	0.022	0.0229
80	5.26	4.8	2.0192	5.75	5.74	4.5	1.7825	1.0695	2.8	5.73	1.327	1.26	0.73	1.33	1.37	1.4	0.92	0.2	0.04	0.06	0.22	0.21	0.16	0.15	0.19	0.19	0.19	0.19	0.2	0.17	0.2	0.19	0.2	0.04	0.05	0.05	0.06	0.05	0.04	0.04	0.04	0.04	0.04	0.0053	0.0427	0.0247	0.0265
85	4.85	5.74	2.4656	5	5.08	4.38	2.2164	1.3206	3.36	5.73	1.6565	1.55	0.89	1.67	1.66	1.69	1.13	0.23	0.05	0.07	0.25	0.23	0.18	0.16	0.22	0.21	0.22	0.22	0.23	0.2	0.23	0.22	0.23	0.05	0.05	0.05	0.06	0.06	0.04	0.04	0.04	0.04	0.05	0.008	0.0495	0.0297	0.0309
90	4.99	4.98	2.9379	5.75	4.88	4.41	2.6972	1.6009	3.89	4.8	2.0274	1.87	1.06	2.04	1.97	2	1.37	0.26	0.06	0.07	0.28	0.26	0.19	0.17	0.24	0.24	0.25	0.25	0.26	0.22	0.26	0.25	0.26	0.05	0.06	0.06	0.07	0.07	0.05	0.05	0.05	0.05	0.06	0.009	0.0564	0.0339	0.0358
95	5.27	4.9	3.4016	5.73	4.72	4.33	3.1929	1.9063	4.22	5.76	2.4287	2.2	1.24	2.41	2.28	2.29	1.62	0.28	0.05	0.07	0.3	0.26	0.18	0.16	0.29	0.28	0.29	0.29	0.31	0.27	0.31	0.29	0.3	0.08	0.09	0.09	0.1	0.1	0.08	0.09	0.08	0.08	0.09	0.045	0.0981	0.0725	0.0754
100	5.05	4.87	3.83	4.92	5.47	4.46	3.7102	2.2466	4.8	5.09	2.8771	2.61	1.46	2.85	2.67	2.66	1.93	0.32	0.07	0.09	0.35	0.31	0.22	0.19	0.3	0.3	0.31	0.31	0.33	0.28	0.32	0.31	0.32	0.06	0.07	0.07	0.08	0.08	0.06	0.07	0.06	0.06	0.07	0.0151	0.0727	0.0443	0.0482
105	5.74	4.86	4.1468	5.75	5.06	4.49	4.0767	2.603	4.86	5.25	3.3523	3.01	1.68	3.26	3.03	3.01	2.24	0.35	0.08	0.1	0.38	0.33	0.23	0.2	0.33	0.32	0.34	0.34	0.36	0.31	0.36	0.34	0.35	0.07	0.08	0.08	0.09	0.09	0.07	0.07	0.07	0.06	0.07	0.0166	0.0796	0.0489	0.0529
110	5.74	4.69	4.3807	4.81	5.06	4.37	4.3959	2.9767	4.94	4.73	3.7609	3.41	1.92	3.63	3.42	3.35	2.57	0.38	0.09	0.1	0.41	0.35	0.24	0.21	0.36	0.35	0.37	0.37	0.39	0.34	0.39	0.37	0.39	0.07	0.08	0.09	0.1	0.09	0.07	0.08	0.07	0.07	0.08	0.0182	0.087	0.053	0.0585
115	5.74	4.63	4.5509	5.73	4.81	4.55	4.5147	3.3742	5.37	5.35	4.1601	3.74	2.16	4.03	3.77	3.68	2.91	0.41	0.09	0.11	0.45	0.37	0.25	0.22	0.39	0.38	0.4	0.41	0.43	0.36	0.43	0.4	0.42	0.08	0.09	0.09	0.1	0.1	0.08	0.09	0.08	0.08	0.09	0.0209	0.0948	0.0579	0.0641
120	5.74	5.74	4.5343	5.23	5.74	4.37	4.5385	3.7527	5.03	5.72	4.566	4.12	2.41	4.37	3.99	4.05	3.24	0.44	0.1	0.12	0.48	0.4	0.26	0.22	0.42	0.41	0.44	0.44	0.46	0.39	0.46	0.43	0.45	0.08	0.1	0.1	0.11	0.11	0.09	0.09	0.09	0.08	0.1	0.0245	0.104	0.0644	0.0713

## Sheet: 5B
Quantification of patient samples through cell phone image
	Fold change
Off state	1
Trigger	4.18384
			Image of plate used in quantification - wells used are boxed (First row, Columns: 2-15 and Columns 17-22)
Ct 16.05	4.18897
Ct 17.71	4.18881
Ct 23.07	4.193
Ct 23.70	4.1956
Ct 28.75	4.20206
Ct 29.76	4.18963
Ct 33.87	3.39766
Ct 34.58	3.24955
NTC	-0.186178
Neg_1	-0.164415
Neg_2	-0.186405
Neg_3	-0.168115
Neg_4	-0.192914

## Sheet: 5D
Sensor12 nanolantern patient sample kinetics
Time(in min)	Ct_16.05	Ct_17.71	Ct_23.07	Ct_23.70	Ct_28.75	Ct_29.76	Ct_33.87	Ct_34.58	Ct_45	Ct_45	Ct_45	Ct_45	Ct_25.44	Ct_31	Ct_32.06	Ct_36.6	Ct_45	Ct_45	Ct_45	Ct_45	Ct_45	Ct_45	Ct_45	Ct_45	Ct_45	Ct_32.92	Ct_35.73	Ct_37.61	Ct_38.72	Ct_45	Ct_45	Ct_45	Ct_45	Ct_45	Ct_45	Ct_45	Ct_45	Ct_45	Ct_45
0	21.04	13.15	10.85	-6.86	46.92	10.56	-16.261	20.14	-10.33	-1.64	-9.25	-13.481	29.44	-7.28	-1.53	0.97	-30.73	-34.88	-24.85	12.18	17.94	-33.72	-11.76	-27.59	-36.76	42.14	63.69	4.93	50.27	43.62	48.24	40.85	30.38	6.55	34.52	39.62	57.48	1.21	8.51
5	235.47	180.47	152.77	155.97	79.12	107.87	81.87	52.95	71.55	94.77	96.67	46.2	113.32	42.53	63.28	42.64	69.75	55.78	71.79	98.72	35.5	69.59	23.09	120.62	50.08	211.51	131.51	116.21	193.41	149.31	118.31	150.71	179.91	91.41	99.61	136.31	190.61	119.51	132.71
10	1611	2233	1531	1520	825	1111	568.7	328.7	299.8	187.8	165.2	146	960.76	327.46	362.56	355.46	303.26	156.36	206.86	210.66	225.56	178.76	205.96	174.86	233.36	952.2	1019.2	415.8	719.9	643.4	431.9	373.3	307.4	326.4	416.6	285	407.1	376.4	267.6
15	9472.4	13465.4	10595.4	10075.4	6133.4	7977.4	3421.4	2422.4	1184.4	756.8	627.2	837.8	6502.5	1837.5	1256.5	1005.5	1009.5	726	556.8	419.2	440.8	553.7	511.8	486.8	624.1	5680.8	5882.8	1631.8	2158.8	2456.8	1036.8	905.8	937.8	834.8	945.8	853.8	902.8	815	798.1
20	22832.7	32472.7	26142.7	27662.7	18182.7	21492.7	10692.7	7320.7	2744.7	1543.7	1177.7	1565.7	18245.5	6251.5	3888.5	2535.5	2593.5	1842.5	978.5	830.5	941.5	956.5	1079.5	1206.5	1187.5	14933.5	15813.5	3645.5	4148.5	5776.5	1813.5	1552.5	1646.5	1475.5	1714.5	1383.5	1356.5	1425.5	1493.5
25	36449.7	51119.7	42849.7	45379.7	32779.7	36279.7	20079.7	14269.7	4210.7	2083.7	1775.7	2844.7	30183.8	12213.8	7928.8	3865.8	4314.8	2990.8	1461.8	1165.8	1366.8	1705.8	1639.8	1718.8	1628.8	27129.3	30579.3	6100.3	6637.3	8846.3	2539.3	2249.3	2362.3	2259.3	2506.3	2236.3	2342.3	2074.3	2166.3
30	44254.5	61634.5	54074.5	56384.5	44954.5	47794.5	29724.5	22194.5	6009.5	2612.5	2152.5	4039.5	38262.9	18112.9	12672.9	5770.9	6092.9	4053.9	2083.9	1903.9	1799.9	2516.9	2190.9	2390.9	2211.9	38646.2	43736.2	8097.2	8037.2	10796.2	3335.2	3097.2	3186.2	2921.2	3064.2	2780.2	2963.2	2785.2	2626.2
35	43309.5	60529.5	54559.5	58619.5	52269.5	52989.5	36219.5	28429.5	7993.5	3174.5	2577.5	4845.5	39238.4	22488.4	17008.4	5983.4	6811.4	4945.4	2486.4	2203.4	2328.4	2693.4	2695.4	2897.4	2760.4	46733.5	51343.5	9803.5	8878.5	11653.5	3852.5	3337.5	3610.5	3209.5	3490.5	3342.5	3412.5	3178.5	3187.5
40	37162	49992	46712	46822	52842	48992	40352	33472	8820	3684	3319	4916	34223.5	25113.5	20873.5	6355.5	7323.5	5211.5	2670.5	2322.5	2441.5	3080.5	3133.5	3191.5	3166.5	48848.7	55018.7	10568.7	9028.7	11168.7	4609.7	3853.7	3995.7	3999.7	4241.7	4096.7	4052.7	3421.7	3662.7
45	28360.4	36980.4	35140.4	34920.4	45800.4	41690.4	40540.4	36560.4	9770.4	4041.4	3414.4	5317.4	26474.6	26224.6	23774.6	6593.6	6751.6	5684.6	2836.6	2697.6	3014.6	3104.6	3185.6	3202.6	3534.6	48562.8	52492.8	11032.8	8985.8	9442.8	5425.8	4370.8	4682.8	4640.8	4898.8	4379.8	4452.8	4037.8	3896.8
50	20129	24369	23179	23829	36659	31999	37489	37139	10469	4412	3670	5452	18465.2	24985.2	25115.2	6849.2	5985.2	5363.2	3239.2	3035.2	3255.2	3564.2	3994.2	3714.2	3813.2	41003.9	44553.9	10193.9	8277.9	7899.9	5597.9	5019.9	4942.9	4622.9	5204.9	4742.9	4937.9	4193.9	4236.9
55	13282.5	14302.5	15352.5	15782.5	26532.5	21462.5	33102.5	34832.5	10432.5	4864.5	4025.5	5262.5	11524.5	23294.5	25274.5	6165.5	5655.5	5115.5	3536.5	3488.5	3606.5	3928.5	4153.5	4158.5	3881.5	33190.6	33960.6	9295.6	8069.6	7035.6	5983.6	4978.6	5175.6	5214.6	5475.6	5137.6	5261.6	4787.6	4707.6
60	8348.4	8361.4	9245.4	9913.4	18373.4	14553.4	27373.4	31263.4	9733.4	4887.4	4270.4	5315.4	7545.8	19682.8	24632.8	5889.8	5005.8	4832.8	3890.8	3813.8	3825.8	4152.8	4078.8	4268.8	4116.8	23548.1	25478.1	8079.1	7374.1	6222.1	6181.1	5241.1	5410.1	5187.1	5874.1	5145.1	5425.1	4892.1	5170.1
65	5641.8	4836.8	5983.8	6636.8	11700.8	9860.8	21010.8	25840.8	8782.8	5137.8	4433.8	5021.8	4408.8	16721.8	22821.8	5765.8	4832.8	4913.8	3872.8	3534.8	3860.8	4303.8	4452.8	4276.8	4083.8	16430.5	17230.5	6810.5	7464.5	5903.5	6481.5	5405.5	5643.5	5605.5	6154.5	5426.5	5508.5	5243.5	5242.5
70	4347	2972	3875	4504	8258	6958	15998	20988	8068	5168	4610	4881	3511	13182	20172	5816	4862	4800	4047	4419	4245	4436	4346	4237	4444	11110.1	11410.1	6892.1	7155.1	5644.1	6332.1	5548.1	5782.1	5450.1	6040.1	5927.1	5953.1	5132.1	5725.1
75	3122	2089	2782	3529	5606	4965	11963	16533	7475	5403	4618	4868	2334.1	10142.1	17072.1	5677.1	4405.1	4665.1	4155.1	3930.1	4586.1	4562.1	4831.1	4523.1	4654.1	7295.1	7683.1	6263.1	7372.1	5619.1	6694.1	5524.1	5919.1	5760.1	6277.1	5880.1	5508.1	5432.1	5182.1

## Sheet: 5E
Patient Ct value - RLU correlation
Ct	RLU at 30 minutes
16.05	44254.5
17.71	61634.5
23.07	54074.5
23.7	56384.5
28.75	44954.5
29.76	47794.5
33.87	29724.5
34.58	22194.5
45	6009.5
45	2612.5
45	2152.5
45	4039.5
25.44	38262.9
31	18112.9
32.06	12672.9
36.6	5770.9
45	6092.9
45	4053.9
45	2083.9
45	1903.9
45	1799.9
45	2516.9
45	2190.9
45	2390.9
45	2211.9
32.92	38646.2
35.73	43736.2
37.61	8097.2
38.72	8037.2
45	10796.2
45	3335.2
45	3097.2
45	3186.2
45	2921.2
45	3064.2
45	2780.2
45	2963.2
45	2785.2
45	2626.2

## Sheet: 5F
		Image shown in 5F - wells shown are boxed (3rd Row from bottom, Columns 1-11)
